# Supplementary material for: Defective CAPSL function causes impaired retinal angiogenesis through the MYC axis and is associated with familial exudative vitreoretinopathy
Source: medRxiv preprint, doi:10.1101/2024.02.22.24303109, version 3 (2024-07-25)
Supplement: Dataset 1 [file 303109_file03.xlsx]

## Sheet: Sheet1
gene name	logFC	FDR	ctrl-1	ctrl-2	ctrl-3	ctrl-4	capsl_kd-1	capsl_kd-2	capsl_kd-3	capsl_kd-4
AP3S1	0.308611	3.60839e-86	148.209	145.784	158.072	153.211	185.792	187.277	195.381	181.194
XPO1	-0.268424	3.12481e-87	73.131	67.973	75.384	72.463	62.156	58.113	65.02	54.605
RRP9	-0.337923	2.97045e-08	24.773	29.577	25.174	26.132	19.918	22.17	19.984	21.52
CDC45	-1.1818	1.20973e-106	19.709	18.85	19.137	19.001	7.391	8.659	9.058	8.698
XPOT	-0.885347	0	78.716	75.528	81.668	77.439	41.893	42.784	44.914	40.042
EIF3J	-0.326095	1.53752e-79	166.1	163.113	160.701	161.22	133.689	123.86	137.029	124.826
PRPS2	-0.542666	3.06866e-42	27.546	32.137	33.87	30.807	22.081	22.006	23.028	18.257
PCNA	-0.396559	3.82972e-89	235.827	243.19	258.501	241.59	185.513	190.555	197.767	169.961
IMPDH2	-0.452401	8.94259e-180	271.784	300.665	287.563	263.167	199.882	206.183	208.302	206.48
APEX1	-0.370563	1.90388e-122	321.844	336.502	330.513	323.787	248.807	260.37	244.103	262.025
POLD2	-0.351383	7.12788e-40	74.306	78.861	74.776	76.252	59.009	62.153	58.264	59.011
TYMS	-0.284432	6.14076e-39	185.583	177.918	183.516	184.93	150.589	150.862	150.973	148.551
MCM5	-0.838232	7.3714e-193	40.735	36.193	40.644	41.588	22.571	21.024	18.846	26.58
MCM7	-0.553191	4.54263e-178	87.641	88.109	78.828	88.802	56.126	60.959	56.626	60.305
MCM2	-0.603259	2.21422e-85	32.059	29.105	29.186	31.887	20.633	18.987	19.99	20.853
CAD	-0.449537	6.52133e-92	34.736	30.766	30.916	32.753	23.31	23.293	23.242	24.743
DUT	-0.358162	4.81057e-34	44.736	41.846	45.483	42.911	31.938	34.055	35.801	34.714
DDX21	-0.305575	5.19134e-125	165.951	158.114	162.869	166.424	133.171	130.852	137.736	126.885
RUVBL2	-0.304517	8.18765e-28	69.331	68.372	73.714	69.045	54.942	55.005	55.907	61.239
SERBP1	-0.533003	0	211.856	190.261	205.663	206.437	139.827	131.954	146.477	144.458
MCM6	-0.866385	6.85726e-175	35.853	31.871	36.403	34.834	20.389	16.478	20.694	18.66
MAD2L1	-0.584664	9.94655e-62	19.004	17.746	20.221	20.472	12.668	12.029	14.232	12.709
ABCE1	-0.316058	2.51276e-107	163.568	144.759	161.768	163.393	131.257	125.415	136.363	115.821
CCNA2	-0.670158	1.13671e-251	114.418	118.603	113.459	119.231	77.854	74.154	75.58	65.081
RFC4	-0.849317	1.39861e-46	15.927	18.472	19.782	17.126	8.825	9.293	10.934	10.525
EIF4A1	-0.340841	0	824.489	889.36	847.58	837.547	659.068	682.121	679.954	662.623
ORC2	-0.43442	2.52635e-34	22.28	22.599	23.263	20.851	17.372	15.433	17.337	15.711
YWHAE	-0.480216	0	780.129	838.116	819.543	818.346	585.376	582.939	616.995	548.914
SET	-0.463391	0	306.724	329.055	329.013	331.999	239.541	228.671	244.933	227.39
RRM1	-0.47271	3.20624e-139	98.169	99.628	100.788	106.096	75.196	74.183	74.082	68.155
NOLC1	-0.403265	5.08956e-120	111.129	112.604	108.423	110.73	81.52	86.016	89.013	78.336
PEDS1	0.316271	4.8076e-99	27.344	29.322	28.728	30.208	36.535	36.446	34.274	36.683
MCRIP1	0.561592	6.3821e-153	33.036	33.203	37.747	34.044	51.775	54.515	44.716	52.714
TNFRSF10A	0.321483	9.41201e-21	14.744	16.861	15.694	15.63	18.238	19.354	18.365	22.681
GET1	0.455159	1.27684e-83	14.086	13.396	16.081	14.721	18.693	21.544	20.844	18.824
QSOX1	0.508346	0	85.373	84.396	87.513	81.357	118.177	123.858	110.683	128.97
MANBA	0.488377	3.10967e-51	7.233	7.839	7.527	6.357	10.308	8.508	10.973	10.834
PLOD2	0.755941	0	525.723	479.694	518.386	527.275	884.852	827.397	950.15	801.326
PLPP3	0.37145	2.16573e-98	49.93	51.925	50.124	53.256	68.583	67.482	66.251	63.188
ABLIM1	0.522083	0	39.326	37.047	39.873	38.988	58.785	53.693	56.275	54.169
ADAM10	0.315636	1.79392e-250	39.543	41.01	44.697	43.907	53.026	50.69	56.258	50.553
CDIPT	0.434968	2.77257e-92	50.698	53.598	54.149	49.968	68.076	73.013	66.078	74.584
TNFRSF10B	0.333283	0	237.947	240.581	251.523	239.656	293.461	300.581	306.338	321.333
TPP1	0.328576	0	241.493	241.965	239.633	234.906	318.83	292.324	301.163	290.711
TSPAN4	0.38588	2.52281e-46	29.571	26.815	30.309	29.183	39.34	34.617	32.027	45.43
GIPC1	0.434139	1.97391e-144	84.945	79.847	88.1	84.887	109.606	116.784	108.666	121.32
PLXNB2	0.31057	3.25835e-135	58.996	48.416	55.542	58.039	70.08	65.855	63.622	74.519
LSM1	0.291887	4.53495e-26	57.395	55.589	66.754	59.363	69.991	73.45	72.506	76.771
DEGS1	0.341169	7.08447e-225	199.49	197.234	212.292	197.989	261.207	252.598	273.065	235.431
PGRMC2	0.441785	1.13931537930991e-320	80.669	85.243	86.198	83.676	112.034	114.298	121.747	108.015
MID1	0.298296	9.50222e-50	13.535	13.745	13.926	15.07	16.96	16.638	17.773	17.832
STX7	0.364412	1.21462e-122	13.39	13.17	13.97	13.566	17.197	16.835	18.423	17.187
SLC16A3	0.920546	0	44.734	49.464	48.958	44.18	83.531	94.026	82.286	94.756
P4HA2	0.70437	3.07241e-234	18.109	17.267	20.37	16.855	27.762	28.881	29.243	32.415
CAPN5	0.293524	2.9269e-23	13.727	13.545	13.9	14.109	16.632	17.02	14.553	19.55
PDPK1	0.360319	4.45488e-53	11.95	11.439	11.761	11.517	15.676	13.648	16.304	14.28
FLRT2	0.31159	9.48197046066978e-309	20.81	21.501	21.241	21.596	27.045	25.549	27.046	26.036
AP5Z1	0.398227	2.65219e-59	16.469	15.101	17.358	14.751	22.73	20.95	19.072	21.171
TPD52L2	0.365243	2.50861e-267	186.327	203.965	201.63	188.037	246.2	253.919	252.186	252.36
LAMTOR5	0.328255	8.16755e-38	47.454	57.183	57.721	47.721	70.513	68.546	64.89	59.805
ATP8B1	0.542925	4.37253e-224	26.684	25.402	29.688	27.945	42.197	35.686	40.926	41.045
SYNGR2	0.66879	7.89582e-219	43.595	44.59	46.58	45.309	74.597	73.642	66.953	71.081
SLC25A20	0.458558	3.00529e-36	18.916	20.808	22.333	22.142	26.406	30.754	30.762	27.783
SCO2	0.33105	8.8482e-16	22.389	22.12	24.335	25.085	30.501	28.788	27.575	31.293
CALU	0.340071	0	369.38	382.769	387.155	377.367	489.961	484.967	503.658	441.246
EDIL3	0.312161	8.8888e-87	44.96	38.745	41.174	45.261	55.707	51.027	58.34	46.167
FZD6	0.290174	7.51906e-119	82.932	77.055	80.783	83.831	103.188	98.7	100.491	94.54
NRP2	0.488366	0	64.773	64.076	66.843	64.189	96.488	86.677	87.981	93.431
SNX3	0.32378	1.26909e-264	308.864	311.985	314.56	326.059	404.489	402.823	413.561	357.988
LPXN	1.07065	0	27.834	27.691	29.427	28.581	55.843	62.742	61.037	58.845
ATP9A	0.304965	2.01291e-82	24	25.366	27.357	24.977	30.628	31.733	32.09	31.189
ADAMTS4	0.39554	4.94154e-68	9.368	10.628	11.071	9.454	13.736	13.133	12.733	13.702
CLN5	0.284802	1.26515e-54	8.038	8.602	8.774	8.315	10.833	10.335	10.427	9.496
RP2	0.310356	6.48931e-68	43.172	39.305	42.819	46.765	55.166	50.195	57.42	50.578
ARL6IP5	0.495831	0	265.619	272.413	274.397	274.605	380.201	380.169	402.687	369.807
WFS1	0.378619	1.62007e-70	26.989	25.691	26.871	25.941	34.419	32.947	32.568	37.217
ALDH1A2	0.712922	3.56312e-280	27.976	27.973	27.849	28.094	48.153	43.773	43.15	48.331
ATG12	0.317467	1.20168e-93	40.255	41.047	43.263	42.738	53.248	50.397	54.717	50.122
MYO1D	0.306765	1.77157e-63	24.338	22.321	23.37	24.75	27.652	29.354	29.521	30.709
SORBS2	0.316182	8.81251e-43	8.944	8.986	10.255	8.088	11.613	10.135	11.843	11.571
ENDOD1	0.722916	0	49.629	52.314	50.108	51.041	88.942	87.875	84.059	74.333
WDR47	0.420914	5.99382e-61	17.626	17.875	18.944	18.741	24.119	24.785	25.666	23.411
YIF1A	0.321049	2.2553e-57	79.587	80.399	86.564	82.36	96.965	110.72	91.753	111.45
VAMP5	0.390072	1.23911e-59	149.757	155.154	153.381	141.168	190.131	208.066	176.324	211.048
RTN3	0.397596	0	136.383	139.804	142.919	136.729	188.275	184.049	186.985	172.9
MPZL1	0.374076	9.71072e-278	94.642	93.491	96.797	94.727	125.924	120.1	128.003	118.013
RAB3D	0.323858	7.13203e-50	24.577	26.057	29.568	24.247	31.346	33.777	30.145	35.469
CAVIN2	0.732299	0	474.832	453.716	472.054	486.512	792.477	746.421	786.47	809.667
ABHD16A	0.323785	3.29919e-21	17.716	17.549	19.881	16.135	23.456	21.682	19.981	24.098
RECK	0.44384	1.57495e-88	24.033	24.575	24.996	23.019	32.34	30.603	35.604	32.883
CLPTM1	0.397966	2.68682e-124	67.204	58.11	61.075	63.534	83.718	74.535	76.464	94.595
CYB5A	0.327127	3.04193e-13	7.064	8.369	7.904	7.573	8.881	10.561	9.123	10.213
CYB5R3	0.40063	2.5235e-302	91.543	94.72	96.897	89.579	122.001	127.547	115.485	127.015
PLAT	1.30412	0	143.998	144.49	156.765	142.044	368.974	344.911	349.16	387.187
OAS1	0.594157	1.70317e-169	19.228	17.206	22.383	20.686	38.214	27.57	24.896	29.339
TIMP1	0.867372	0	83.399	95.811	91.352	86.878	150.26	172.934	155.588	173.312
HLA-B	0.420544	2.90328e-138	118.364	111.358	132.906	118.356	189.983	160.031	140.842	152.91
COL4A1	0.751229	0	139.051	125.251	125.959	137.609	231.744	221.485	217.562	217.736
FN1	0.367071	0	1121.86	1051.59	1074.39	1125.62	1383.17	1395.19	1436.23	1425.99
TFRC	0.830747	0	81.584	74.047	78.276	83.402	144.558	140.102	148.938	130.773
SLC4A2	0.359964	2.73103e-128	38.462	37.101	39.42	38.725	48.493	50.151	44.177	54.448
ITGB3	0.664982	0	69.209	78.858	78.321	73.076	119.615	123.658	118.984	112.56
SERPINB2	0.999398	0	56.685	52.858	60.696	55.18	101.736	138.56	108.035	102.323
ITGAV	1.01462	0	170.169	158.193	168.147	175.275	343.687	341.23	357.754	314.586
GPX1	0.513688	0	571.774	564.669	590.598	552.407	788.436	878.295	767.45	820.178
THBD	1.18452	0	25.292	26.199	26.008	27.259	59.907	60.613	58.851	58.737
P4HB	0.360763	0	649.123	630.034	665.148	647.162	841.729	820.187	784.073	881.727
CTSD	0.395035	0	265.938	258.429	272.745	262.56	348.644	343.665	323.31	377.824
CTSB	0.650537	0	272.683	286.395	291.312	270.072	436.369	431.925	431.022	459.534
LYN	0.446357	9.84228e-84	16.409	16.623	17.405	17.053	24.211	22.438	23.454	21.86
MGP	0.750766	0	222.402	277.128	271.482	228.123	431.858	395.458	396.39	457.527
COL4A2	0.405787	0	102.861	90.082	97.008	102.045	129.113	128.045	120.677	141.487
CFH	1.71696	0	37.018	34.024	38.079	36.76	111.697	120.773	115.808	131.305
ITGA5	0.664304	0	1407.88	1309.81	1350.3	1376.83	2164.34	2109.1	2118.73	2236.8
FGF2	0.554141	5.57893e-102	13.679	11.336	13.727	12.38	19.636	19.504	17.528	18.396
ACAA1	0.406476	6.09058e-43	28.525	30.088	30.875	23.827	39.504	36.095	34.711	39.884
SPARC	0.61801	0	1238.06	1215.77	1286.99	1225	1885.36	1849.56	1892.22	1994.19
TPM1	0.475109	0	118.553	121.829	119.396	122.705	163.078	171.456	172.971	163.159
IFIT1	0.950643	4.63049e-173	8.595	10.491	10.94	7.864	31.723	15.485	13.901	12.126
FURIN	0.292219	4.1169e-204	129.134	116.019	125.46	124.933	151.087	158.441	140.897	156.383
RRAS	0.415553	3.39969e-110	150.886	161.674	151.36	157.736	210.393	203.748	203.909	211.122
PRKAR1A	0.354882	0	142.305	138.956	151.868	144.808	190.252	174.52	192.249	182.093
CLU	0.854557	0	128.621	121.885	133.206	121.878	226.332	192.801	209.244	285.836
LAMP1	0.620045	0	388.548	417.117	430.452	394.767	620.086	644.516	589.884	652.06
IGF2R	0.765809	0	14.167	14.52	15.683	14.366	24.998	25.224	24.152	25.499
ACTN1	0.360115	0	322.795	299.801	317.4	323.301	407.203	375.629	388.065	450.582
LAMP2	0.336626	0	78.127	71.717	79.597	81.16	99.884	96.092	103.728	92.524
ICAM2	0.38199	0	685.31	598.377	702.312	621.801	837.917	765.361	783.228	1011.82
P4HA1	0.651746	6.6707e-245	46.572	47.79	50.536	44.492	76.177	74.632	77.704	69.034
CD59	0.297419	0	733.412	778.703	805.499	761.206	948.549	965.415	979.28	890.454
JUP	0.386554	3.24094e-218	83.358	79.336	85.788	81.51	111.486	104.317	101.638	113.948
PVR	0.748777	0	137.436	138.469	131.883	135.267	234.507	243.052	221.961	213.015
ARSA	0.330191	8.75113e-39	18.936	21.438	20.377	17.451	24.851	24.391	22.47	26.603
CD46	0.364533	0	189.349	193.578	216.894	195.245	257.797	249.326	272.626	243.872
GNS	0.283004	0	173.86	170.595	178.042	176.409	225.535	207.794	216.329	200.72
ARSB	0.357295	1.44535e-58	11.756	12.704	13.621	11.687	15.979	16.055	15.484	16.237
TIMP2	0.699973	0	255.581	258.896	266.376	252.536	428.904	405.772	407.536	436.505
CD44	0.476477	0	186.029	196.876	201.231	188.083	273.461	270.867	291.021	239.073
ITGB4	1.24901	1.72091e-65	1.702	1.539	1.439	1.391	3.376	3.572	2.887	4.6
ACADS	0.518912	4.09e-17	6.898	8.502	8.028	6.75	10.448	12.586	9.4	10.809
PECAM1	0.285023	0	608.783	583.428	629.603	607.127	774.313	687.66	718.11	779.411
PRKCA	0.504481	2.54072e-180	15.729	16.552	15.894	16.076	22.85	22.578	23.203	22.518
GJA1	0.680604	0	432.311	429.942	425.488	441.351	694.062	726.04	732.64	618.667
SMPD1	0.802883	0	113.983	113.932	119.118	115.67	197.9	209.807	185.296	214.224
NDUFB7	0.337159	3.86122e-28	108.063	101.734	125.376	111.443	142.701	141.443	131.121	148.931
GM2A	0.476836	1.61611e-157	35.398	41.885	41.289	36.762	54.589	53.911	55.691	51.987
FLT1	0.32717	1.05866e-151	25.596	26.589	25.633	27.077	33.523	36.547	32.63	28.897
ITGB5	0.505333	1.20198e-305	61.235	60.125	63.967	59.639	87.473	82.907	79.877	97.462
VCL	0.646578	0	137.234	134.034	137.149	140.05	217.619	209.422	220.215	211.344
PAM	0.376615	1.17287e-268	89.501	82.82	90.273	86.861	118.396	106.033	115.529	113.738
CDH2	0.324089	1.3273e-142	49.672	47.563	51.771	53.798	61.081	64.951	66.599	61.255
TCN2	0.493803	2.87541e-206	88.416	87.712	96.548	90.783	128.979	124.388	115.284	143.156
COL5A1	0.572986	0	147.389	130.2	136.428	149.917	210.19	202.87	207.764	218.086
CD9	0.623572	0	525.8	565.028	590.159	626.941	904.839	888.332	848.35	914.272
GPX3	0.83136	9.16019e-18	2.51	2.643	3.371	2.413	4.645	6.263	5.091	3.465
JAK1	0.427496	0	117.046	109.747	118.744	116.197	160.806	155.891	158.556	145.733
PTPRB	0.446931	5.35197e-293	27.868	26.211	28.219	27.885	39.502	36.792	37.307	36.595
PTPRE	0.290831	1.45543e-62	21.872	20.393	20.917	22.511	25.495	26.604	24.987	27.747
F8A3	0.300019	0.625686	0.351	0.252	0.161	0.214	0.308	0.338	0.22	0.339
MYL9	1.82091	0	36.755	37.157	36.1	37.466	131.942	143.909	120.093	125.113
FAS	1.22733	2.28195e-237	1.827	1.745	1.951	1.929	4.538	4.221	4.748	3.946
MGAT1	0.324029	3.68929e-130	29.541	30.573	30.666	28.61	36.605	39.116	34.5	39.235
AK4	1.29541	1.14054e-307	5.291	4.223	5.424	5.031	13.252	11.971	13.466	10.33
COL8A1	0.944344	0	194.378	199.018	199.135	201.758	386.412	391.575	374.545	375.933
LOX	0.936302	0	153.736	147.012	152.201	155.294	301.089	310.631	296.995	255.233
PTPRM	0.341442	6.09015e-53	16.915	15.116	17.246	17.5	20.833	19.783	20.544	23.449
NOS3	0.381771	3.54924e-178	61.686	53.574	62.66	60.889	74.224	82.003	69.89	85.038
OAS2	0.548374	2.05438e-146	16.879	13.806	18.784	15.87	36.649	20.72	18.958	19.229
PRDX5	0.511689	4.17322e-294	247.389	369.972	298.902	272.223	359.991	472.782	435.669	426.006
ECHS1	0.336794	1.16678e-50	81.223	75.809	92.485	85.668	101.565	100.768	104.962	116.027
LRPAP1	0.275581	1.38045e-69	19.371	17.742	20.229	20.257	22.959	22.185	23.064	25.725
GBP1	0.68298	9.19666e-237	35.169	33.039	39.277	35.429	66.921	51.674	58.999	51.85
GALNS	0.316416	1.61986e-29	19.738	18.375	20.655	20.63	22.729	23.275	23.066	29.8
FBN1	0.935966	0	34.721	33.348	35.519	35.555	68.755	63.684	66.33	67.439
FBN2	0.327052	3.91555e-234	42.349	40.877	42.216	40.262	51.618	50.768	53.95	51.532
MYH9	0.321289	0	519.832	460.609	488.674	520.243	626.544	596.954	610.445	651.654
BSG	0.421406	0	289.255	254.743	296.573	284.886	367.442	369.559	350.216	420.032
TIMP3	1.8261	1.00424e-19	0.149	0.234	0.209	0.278	0.84	0.752	0.79	0.713
KDR	0.348107	0	126.191	117.062	128.868	126.971	169.398	146.622	157.137	162.133
TGFBR2	0.364362	0	318.978	297.771	325.007	324.947	420.909	402.222	420.279	387.233
PRCP	0.694588	0	123.254	125.616	134.609	121.824	210.816	197.739	203.027	206.214
ECE1	0.281229	0	304.706	285.469	308.244	314.424	375.385	345.153	339.413	413.933
MCAM	0.281718	0	1770.46	1771.6	1854.86	1779.57	2166.84	2106.89	2094.72	2355.58
PPIC	0.344583	4.06047e-48	62.354	62.93	75.825	65.767	78.36	80.964	92.849	86.703
UTRN	0.320011	4.49825e-212	34.898	34.187	34.57	33.661	45.041	40.811	43.453	42.113
LIMS1	0.429535	0	92.304	87.072	94.259	97.573	126.526	119.362	131.924	122.132
MARCKSL1	0.34738	2.76899e-236	302.544	314.206	313.201	300.148	390.518	403.874	375.64	394.96
DNASE1L1	0.742101	0	73.117	74.698	75.117	75.292	121.966	129.327	119.24	128.282
CPT1A	0.384936	2.82921e-249	59.039	66.325	65.224	62.768	80.131	82.678	81.844	86.181
BCAP31	0.272427	2.36595e-87	107.204	116.651	126.977	114.994	131.494	133.534	137.456	160.159
SGSH	0.455475	1.69623e-148	54.635	52.99	57.592	52.593	74.567	75.036	67.838	81.229
CLCN3	0.3085	1.05817e-86	30.772	28.166	28.997	29.522	37.443	34.969	39.104	33.946
DYNLT3	0.391018	1.76927e-134	66.461	63.711	72.234	66.328	88.99	84.888	93.991	84.528
GPR143	0.901949	2.37117e-124	17.797	20.286	20.835	19.252	35.379	33.293	36.003	41.396
POLR2J	0.307711	8.21242e-10	18.556	26.403	23.423	21.989	26.036	23.367	23.128	39.326
MRPL12	0.272358	3.24951e-38	114.681	106.179	120.584	119.987	128.542	138.192	142.773	147.801
DAPK1	0.303263	8.16235e-73	31.271	28.798	31.194	29.841	37.031	35.78	37.67	38.954
PTTG1IP	0.44374	0	516.328	536.333	547.547	526.363	712.038	718.137	730.617	731.614
CACNA2D1	0.454001	1.15997e-153	24.614	21.535	23.256	24.836	32.201	32.075	33.285	31.535
ATP1B3	0.490401	0	193.33	204.902	207.326	196.802	285.234	280.591	288.923	272.437
EPHA4	0.772863	2.53515e-139	8.358	7.806	8.686	7.328	14.107	12.911	14.271	13.695
FCGRT	0.544289	3.35657e-143	38.851	39.723	42.199	35.33	54.987	56.247	51.66	64.753
CD81	0.677527	0	164.419	180.355	180.404	156.578	274.203	278.043	257.109	281.045
S100A10	0.43255	0	987.27	1086.6	1128.68	958.047	1343.45	1411.53	1443.94	1416.29
RAB4B	0.326907	7.70699e-12	13.075	17.394	17.213	11.558	17.596	19.256	17.988	19.467
ATP6V0D1	0.578628	3.41017e-234	78.721	78.075	74.013	75.1	116.799	115.472	110.533	114.051
TGFB2	1.85548	0	30.78	29.204	29.13	31.92	111.962	109.809	118.112	98.116
NPC2	0.787214	0	81.838	89.249	94.808	81.357	146.64	144.789	140.15	167.69
RRAS2	0.341802	5.31859e-162	97.174	86.525	106.092	98.551	132.95	118.148	125.231	115.833
UBE2H	0.343472	7.86972e-252	89.656	91.965	94.956	90.062	117.976	113.218	116.58	117.421
GRB2	0.498229	0	82.791	81.216	88.778	83.415	120.629	117.663	113.806	122.779
ACTC1	5.16993	0.565771	0	0	0	0	0	0	0	0.14
JAG1	0.941752	0	33.643	33.891	32.447	34.763	64.287	66.627	65.133	62.781
SPTBN1	0.445434	0	84.589	87.232	88.27	89.318	118.332	113.683	120.241	123.544
IL1RL1	0.599659	0	603.183	616.19	649.824	620.236	946.915	981.792	984.08	859.598
PLOD1	0.570155	0	201.055	194.638	204.063	201.215	291.824	298.926	272.121	326.319
TAP1	0.326393	3.1877e-40	33.776	33.304	36.585	32.268	48.692	39.964	35.919	45.869
EEF1A2	1.62297	1.92813e-183	5.611	5.803	7.4	7.114	20.121	20.631	19.973	19.144
CALD1	0.680326	0	237.244	217.644	227.102	235.232	370.987	369.652	388.657	340.556
APLP2	0.329151	0	1054.56	1053.64	1110.38	1062.04	1356.51	1261.99	1322.43	1436.71
MGAT5	0.421725	1.06094e-192	30.528	31.37	31.49	30.518	41.143	40.428	42.631	41.775
AHNAK	0.373941	0	160.823	175.145	172.205	159.663	218.747	212.415	220.116	214.164
FCHO2	0.288369	5.54907e-44	23.884	21.521	25.439	22.947	28.585	26.76	29.462	29.737
GALNT2	0.790947	0	104.085	103.211	112.328	103.635	173.998	188.153	170.667	199.512
BST1	0.47594	7.08803e-30	8.969	10.888	13.023	9.355	14.58	14.078	14.866	15.219
FSTL1	0.433144	0	679.462	699.574	725.422	688.166	937.501	937.825	984.988	910.211
HYAL2	0.603892	0	210.955	211.998	207.852	207.561	318.37	313.2	290.766	351.824
PTPRJ	0.557563	1.12283e-145	12.249	13.661	12.8	11.659	18.122	18.177	18.468	19.367
EPS8	0.416763	1.9754e-41	6.835	7.584	7.406	7.622	9.683	10.395	9.373	9.86
ANK3	0.376606	3.91001e-30	1.927	2.194	2.053	1.982	2.65	2.558	2.941	2.441
DLG1	0.870133	0	24.489	23.792	25.503	24.441	47.99	40.806	48.813	41.933
MLLT11	0.428395	1.42091e-221	124.767	115.666	122.364	121.529	159.037	175.585	166.031	151.123
MMRN1	0.402508	0	813.177	748.288	826.376	826.483	1083.74	1012.03	1107.93	1045.01
NME3	0.502639	1.54682e-40	35.314	43.688	45.16	36.279	59.222	54.171	48.822	65.1
STX3	0.403808	2.60657e-149	30.634	31.229	32.221	30.759	42.919	38.88	42.016	41.353
ADAM9	0.353694	0	229.859	221.961	241.978	235.93	293.388	282.683	316.401	295.562
ADAM15	0.444366	0	215.67	209.26	229.957	211.907	297.109	285.866	268.871	327.616
TMED1	0.291103	3.20939e-20	30.187	29.232	29.851	30.001	34.84	39.452	33.245	38.401
ASAH1	0.579875	2.40873e-95	10.304	11.649	11.542	10.435	16.902	15.538	16.491	16.734
SERINC3	0.318207	2.59557e-217	100.911	107.565	110.707	102.074	134.467	122.436	141.167	127.146
STIM1	0.51402	3.18026e-178	29.763	28.564	29.728	27.563	43.055	42.523	38.46	41.069
LAMC2	1.047	0	20.126	19.961	20.966	19.583	43.918	36.893	43.567	42.239
SPTAN1	0.595198	0	88.275	79.272	82.542	87.14	130.139	123.988	121.081	134.239
SCARB2	0.283673	1.25825377849586e-317	135.77	126.484	139.207	135.393	168.453	156.154	167.072	161.829
IL18	3.59565	0	2.023	1.318	2.28	3.669	27.792	25.709	27.289	31.563
CTTN	0.283919	2.90501e-199	172.205	170.398	187.767	172.263	203.906	202.439	201.679	247.431
LRRC32	0.355847	3.41454e-177	77.963	76.403	80.987	80.994	109.78	97.974	90.471	106.617
GAS6	0.30518	1.149e-53	56.178	54.897	59.506	57.069	69.908	64.786	62.584	84.001
GRB14	0.414308	8.96302e-46	26.168	23.847	26.811	24.568	32.791	30.167	35.819	36.348
FAT1	0.888426	0	8.114	7.305	7.449	7.952	13.954	15.084	13.954	14.064
KANK1	0.418396	1.41868e-108	19.126	17.588	18.496	19.334	25.036	25.053	25.359	24.177
MESD	0.273157	1.83381e-88	33.696	36.581	38.673	34.069	41.645	44.489	44.242	42.456
MVP	0.28999	6.33367e-260	199.402	203.247	215.875	198.764	238.397	244.998	235.871	279.977
POSTN	3.24907	0	4.892	4.839	5.318	5.072	51.265	48.257	49.677	42.136
ACOX1	0.319153	3.36446e-68	17.508	19.736	18.068	18.578	23.536	22.699	23.706	22.245
PPP2R5B	0.448434	1.2084e-60	25.037	24.378	27.325	29.741	38.192	35.071	33.815	38.223
CYTH1	0.558822	2.11627e-152	27.442	25.556	27.713	25.691	38.769	35.556	39.212	43.202
TGFBI	1.57307	0	38.001	37.577	37.724	43.576	114.044	123.428	119.717	109.589
RAB30	0.743655	1.85875e-206	7.608	7.291	6.805	8.029	13.32	12.466	13.012	10.99
ATP6AP1	0.356594	3.18349e-253	100.482	101.948	103.394	99.237	128.415	132.758	123.794	133.674
IGFBP7	1.08772	0	572.084	568.107	587.071	593.501	1255.23	1236.07	1236.46	1204.75
EXT1	0.706867	0	40.317	42.129	40.863	41.375	66.56	72.376	63.449	66.424
CCL14	1.28316	1.25654e-282	9.267	12.163	10.942	9.306	27.034	23.245	24.272	26.887
TST	0.535877	1.60206e-43	20.352	17.765	22.728	21.759	28.519	29.674	26.829	34.741
ATP6V1F	0.431494	2.3509e-98	178.044	169.958	161.291	170.605	205.908	232.893	241.658	236.473
TMEM132A	0.385991	2.46938e-137	62.954	55.579	66.538	62.59	85.403	78.96	71.148	88.123
PREPL	0.273463	1.21861e-59	23.038	21.638	22.838	23.045	27.578	26.51	28.718	26.654
ANO6	0.561571	0	37.884	37.511	38.207	39.268	57.27	57.493	58.616	52.24
FILIP1L	0.557775	4.06557e-219	23.855	23.634	23.83	23.955	37.155	34.932	37.356	30.802
PHLDA2	0.373295	2.75941e-46	93.098	87.922	79.469	96.318	115.986	124.631	108.111	113.448
HSD17B12	0.359035	1.43169e-185	96.253	96.138	105.657	97.595	126.763	125.624	133.663	121.39
MEST	1.7356	0	11.402	11.048	11.064	12.773	40.117	42.561	36.745	34.73
TNFAIP8L3	0.57514	1.86152e-255	66.402	75.279	77.811	71.528	111.158	114.176	104.422	103.814
WDR45B	0.368992	1.4155e-116	83.771	84.793	85.955	79.445	105.79	106.75	98.459	120.3
WLS	0.460051	0	96.249	100.001	106.691	94.219	135.971	133.082	134.076	143.202
GPR107	0.489884	1.29917e-212	25.74	24.668	24.269	27.312	36.81	34.627	35.264	36.527
SPRYD7	0.329678	9.33002e-22	13.674	13.282	14.97	14.327	17.239	18.925	17.929	16.603
CD276	0.606255	0	87.799	88.876	87.465	86.695	136.949	131.18	129.04	136.91
ATL3	0.667912	0	76.361	78.007	83.233	78.589	125.018	121.86	134.619	120.859
MCTP1	0.522177	0	53.767	52.341	52.155	54.383	75.375	72.42	81.71	75.882
LAMTOR1	0.40049	7.37403e-115	74.812	76.186	79.448	75.564	101.801	106.102	91.65	104.368
CAVIN1	0.293846	0	1012.97	1096.98	1050.9	1018.8	1256.81	1306.17	1246.01	1314.86
ERAP2	0.273663	2.47641e-137	64.168	64.91	63.877	64.503	78.361	72.257	85.148	75.469
FDX2	0.492633	1.15208e-21	16.836	20.368	17.811	18.414	23.58	30.654	25.076	24.007
LHFPL2	0.359776	1.52778e-200	70.387	70.743	74.294	73.281	93.685	92.653	93.253	90.884
TOM1L2	0.472357	5.88199e-99	17.564	16.656	16.317	15.594	22.427	21.152	21.899	26.272
IKBIP	0.298288	4.8215e-138	86.967	81.752	85.966	86.544	104.384	105.419	112.389	97.413
LRP10	0.418406	0	89.54	93.674	94.339	87.011	126.18	121.167	113.181	126.695
P4HA3	0.583412	3.60963e-104	19.444	25.481	24.921	20.134	33.889	32.583	31.877	36.478
ARHGAP22	0.315762	1.71831e-47	21.112	22.157	23.592	22.415	26.149	28.264	27.256	29.451
PHLDB2	0.334869	3.68343e-144	26.764	24.232	26.967	27.624	34.458	30.8	35.759	32.157
ACOT1	0.457029	6.36572e-06	2.946	3.062	3.742	3.028	4.58	4.443	5.201	3.318
FERMT3	0.35372	3.14214e-111	83.382	79.168	95.51	81.924	106.273	116.297	100.678	111.202
OSTM1	0.42167	5.68986e-108	33.13	28.294	31.291	35.381	45.598	42.86	44.565	38.56
STING1	0.416117	8.95028e-105	49.067	55.288	59.036	51.365	69.539	73.864	66.573	76.581
STX12	0.359679	6.16574e-227	129.648	134.36	136.639	128.8	171.377	169.778	177.668	160.533
PLD3	0.340175	1.2698e-139	107.157	99.099	113.194	105.174	133.05	130.876	120.914	152.697
HID1	0.507114	3.71738e-45	13.135	12.171	13.394	13.824	18.649	18.478	15.47	22.052
AHNAK2	0.763764	0	23.245	25.273	24.479	23.379	40.931	41.418	42.086	39.206
SAMD9L	0.760415	0	24.078	20.46	24.422	23.843	50.025	35.914	38.001	33.269
SLITRK4	0.777625	9.69085e-238	10.56	8.966	10.528	10.993	18.789	16.237	17.384	17.96
SLC44A2	0.288914	2.86706e-92	70.077	68.947	71.649	67.8	86.987	85.229	77.335	90.666
LRRC8A	0.370725	2.87077e-194	75.499	69.547	73.56	78.63	95.229	94.127	93.383	101.589
MSRB3	0.408535	2.73719e-218	49.221	48.178	52.147	47.314	66.374	66.042	65.548	63.337
PLCD3	0.574988	2.865e-73	9.92	7.664	9.752	9.185	13.689	13.955	12.562	14.2
PALS1	0.342076	2.64439e-64	17.301	15.791	17.207	17.064	21.947	20.518	22.971	19.953
SYNPO	0.364285	0	91.067	86.06	86.817	86.96	114.381	109.925	114.568	112.826
AFAP1	0.375973	9.55048e-212	45.292	42.878	45.936	47.292	58.215	59.021	57.628	60.54
ADAMTSL1	0.521127	1.34402e-181	14.86	14.378	15.756	14.672	21.254	21.188	21.042	22.143
TRIML2	1.77688	0	8.78	10.328	9.077	8.359	31.807	31.401	27.903	34.129
TMEM102	0.404802	2.63425e-11	6.493	6.443	9.628	6.996	9.691	9.796	9.086	10.563
MIGA1	0.569927	2.21678e-96	9.846	8.958	9.867	10.518	14.543	13.922	15.994	13.717
SIDT2	0.286614	1.91869e-30	20.218	17.093	18.393	18.591	24.513	23.093	19.376	23.642
RDH13	0.371551	1.13894e-11	4.143	3.047	5.052	4.728	4.475	5.692	5.651	6.138
TXNDC5	0.305687	0	1606.57	1601.95	1611.78	1603.91	1965.69	2026.38	1955.98	1992.32
DAGLB	0.275604	1.41181e-35	30.605	31.664	35.822	30.503	35.5	37.001	35.817	47.346
GPRC5A	1.01964	0	57.929	60.873	58.181	58.88	121.958	123.935	115.578	116.726
SGMS2	0.467297	2.26351e-175	28.695	26.379	27.859	28.679	39.405	38.06	40.079	36.763
CD99L2	0.41647	2.99085e-106	27.262	25.919	29.443	27.353	36.509	36.721	35.32	38.233
TRPM4	0.603609	1.55729e-87	10.344	9.33	11.395	10.31	15.516	15.41	13.77	18.182
MGARP	0.668545	3.20471e-301	127.145	140.607	144.006	119.915	200.312	219.834	212.464	212.47
SLC20A1	0.380193	7.86183e-267	110.726	116.767	118.22	114.61	149.581	149.556	155.852	144.13
CANT1	0.464245	2.77554e-258	80.759	73.116	75.94	76.997	103.264	104.565	102.223	113.226
LMO7	0.903152	3.80494e-156	3.959	4.405	4.581	4.078	8.007	8.228	8.317	7.287
SELENOM	0.64594	5.05645e-61	36.415	33.386	37.284	29.635	57.213	53.438	48.543	54.742
PALLD	0.376293	3.05041e-166	30.868	31.341	32.838	29.901	39.899	40.758	43.921	37.606
ROBO4	0.323083	0	379.235	364.223	369.02	376.838	469.826	455.546	444.34	493.425
PIEZO1	0.359538	0	98.048	79.261	83.394	90.9	115.708	108.583	105.724	121.098
NCSTN	0.332853	8.69958e-190	117.304	122.309	125.269	114.048	153.631	151.682	144.141	153.76
ELMO1	0.388943	1.33757e-41	9.105	8.969	9.69	8.579	11.622	11.946	11.402	12.62
NECTIN2	0.278674	2.41612e-163	146.995	138.545	155.428	146.132	178.935	184.174	163.05	186.041
HTRA1	0.570629	0	151.086	156.519	157.715	149.024	230.966	227.741	223.477	230.224
BAD	0.432123	2.80549e-50	37.886	45.958	46.742	36.323	48.534	60.286	55.82	60.558
ATP6V0A1	0.36289	3.78899e-49	19	17.503	18.478	19.641	22.919	23.736	23.918	25.392
EXT2	0.400819	1.27114e-264	36.362	36.954	38.524	36.877	50.409	47.288	48.369	50.28
MYDGF	0.346734	6.98148e-107	130.434	149.887	142.19	127.393	162.314	175.616	168.825	192.547
CCDC47	0.299908	3.86267e-153	97.657	96.905	97.89	96.658	119	118.842	124.924	116.255
PBXIP1	0.500981	4.29084e-184	46.011	53.048	52.284	45.671	67.19	68.23	70.016	73.375
RHBDF1	0.423667	3.33067e-85	35.915	34.776	36.956	37.158	47.126	47.582	44.76	54.765
RCN3	0.63128	0	154.703	159.926	156.017	152.352	229.199	245.517	232.661	257.611
CCDC51	0.476053	1.79277e-106	43.216	57.13	51.908	35.255	60.662	72.68	62.79	64.682
CYFIP2	0.339344	1.54659e-38	9.56	9.571	11.088	9.81	12.938	11.302	12.831	13.574
ATP5MK	0.607823	1.04595e-190	128.938	142.023	150.085	125.105	197.159	224.487	204.17	206.497
B3GALT6	0.413726	1.17185e-50	24.55	25.616	28.167	25.351	32.411	38.891	32.154	34.665
DHRS1	0.444974	1.23299e-27	16.159	16.839	18.583	15.735	20.87	23.514	22.376	24.878
CARD19	0.353235	1.2792e-13	10.16	10.508	14.716	8.747	13.854	12.983	13.384	16.154
MBOAT7	0.328994	1.13602e-202	106.071	104.598	108.825	108.597	137.722	132.575	126.878	140.567
DCBLD2	0.556555	0	168.041	177.308	185.488	190.047	267.21	263.49	292.119	237.425
FMNL2	0.317874	1.26592e-112	41.691	41.782	47.085	45.07	54.958	51.431	57.028	55.503
PANX1	0.564994	9.15393e-100	26.398	25.722	24.529	28.641	40.984	39.126	40.277	35.379
IL4I1	0.436009	1.84027e-41	21.696	22.246	24.3	19.22	28.981	28.097	27.765	33.482
MYADM	0.697932	0	80.803	90.91	86.542	90.18	139.168	156.642	136.383	133.033
RMDN3	0.415844	1.40493e-56	24.737	26.137	25.722	22.592	34.498	35.725	29.532	32.571
CNN2	0.483064	0	226.058	231.777	226.824	233.377	314.698	323.269	308.156	337.026
PDCD1LG2	0.931388	8.25701e-193	21.201	19.726	22.053	19.867	45.103	37.275	40.64	34.984
APOL2	0.414431	2.47772e-109	44.55	55.161	52.621	45.051	67.97	64.084	64.907	66.107
NUDT16L1	0.547067	1.16322e-35	14.579	14.46	16.251	13.49	20.283	23.404	18.596	23.603
ADPGK	0.281747	3.40724e-48	38.657	41.679	40.862	41.146	50.051	47.985	50.402	48.919
NDFIP1	0.35161	7.11148e-156	82.63	81.682	86.278	79.074	103.958	101.619	113.911	101.159
DOHH	0.276513	1.48869e-08	8.924	12.149	9.483	9.409	9.314	14.119	12.014	12.962
TMED9	0.544326	0	194.31	220.622	218.577	192.356	282.974	319.171	289.749	312.499
JAM3	0.520394	0	131.383	124.034	130.582	138.219	191.729	189.829	185.847	184.507
RAB11FIP5	0.395779	1.05242e-164	42.683	41.672	41.442	42.634	56.725	55.034	50.58	59.259
C1QTNF6	0.519481	4.59187e-127	37.671	38.869	38.758	39.977	53.352	58.638	51.751	58.838
C1QTNF5	0.802184	0	95.736	122.891	120.927	98.105	197.772	199.433	164.877	201.084
BCL2L13	0.280191	4.35264e-75	30.089	31.639	30.329	29.867	39.104	37.235	36.616	35.105
TMEM59	0.532603	7.86813e-223	20.701	21.549	23.273	19.933	29.796	29.302	31.148	33.371
ANGPTL4	1.66666	0	41.784	39.131	39.84	42.106	127.4	135.231	121.172	133.253
FRMD8	0.54278	5.30721e-190	40.483	40.412	43.825	41.497	61.583	61.703	54.483	64.374
ULBP2	0.647165	9.88487e-26	11.741	9.508	13.049	10.926	16.302	21.292	18.204	15.029
TNKS1BP1	0.305101	8.64861e-178	68.095	72.224	70.637	68.8	85.51	83.009	83.486	93.636
TTYH3	0.390614	0	164.158	158.861	167.179	163.657	215.143	217.161	195.156	229.713
YIPF3	0.442307	2.91073e-162	78.211	83.332	81.802	75.647	109.836	109.547	103.119	110.938
MAP1LC3B	0.491734	0	121.131	128.892	132.652	120.214	180.847	176.706	185.44	164.138
MCOLN1	0.489058	1.35664e-41	21.125	19.097	20.536	21.785	28.802	30.597	28.311	28.143
TWSG1	0.639811	0	106.179	98.761	117.004	111.125	170.203	166.38	173.284	164.911
TOLLIP	0.629652	6.25293e-238	34.005	35.846	39.168	34.053	54.659	57.282	51.326	58.095
MAGT1	0.318755	7.49764e-197	75.603	80.174	82.266	81.527	101.515	94.6	104.217	98.254
RAB1B	0.302423	1.62055e-246	322.57	346.524	340.321	314.542	410.954	413.965	379.015	428.789
LMAN2L	0.492583	4.40446e-52	21.788	21.325	21.46	19.888	28.576	29.36	29.871	31.028
KIF13A	0.394815	1.40619e-107	15.416	15.375	16.979	16.364	21.401	21.384	21.39	20.148
TPK1	0.278968	2.4247e-13	10.2	10.961	11.915	9.962	12.336	13.559	13.534	12.791
DNAJC5	0.411679	1.72196e-222	63.448	61.201	61.897	61.596	83.072	83.216	79.127	84.673
EHD1	0.43922	0	125.312	118.753	120.188	123.613	166.945	169.036	153.855	171.649
ATP13A3	0.426203	2.45298e-269	46.951	40.91	45.129	49.71	60.486	66.483	65.319	53.206
UBTD1	0.358195	4.66959e-43	53.252	45.325	56.3	53.581	68.838	69.384	60.694	68.291
NMNAT1	0.470585	2.38613e-26	6.262	6.762	6.324	5.773	8.499	7.87	9.683	8.759
SMURF2	0.352905	0	109.9	109.325	117.654	111.424	147.166	134.146	148.373	142.857
NTN4	0.529729	0	244.035	218.405	235.769	240.315	339.978	331.531	351.561	331.839
RRAGC	0.607672	0	82.423	81.045	90.253	80.522	129.224	127.372	133.631	119.094
EPG5	0.390812	1.35881e-57	6.62	7.167	6.214	6.614	8.579	8.447	9.536	8.335
EPB41L5	0.45875	6.20188e-81	10.692	11.551	12.88	10.106	15.937	14.494	16.288	15.443
PGAP6	0.447758	1.73492e-178	54.878	52.382	59.96	54.952	77.87	76.759	69.322	79.075
EMC7	0.53564	2.04367e-101	81.243	77.479	85.587	82.21	119.685	118.578	118.471	116.585
CD93	0.359568	0	296.537	288.127	296.924	292.148	384.4	375.526	374.846	371.181
RTN4	0.377961	0	332.173	352.64	350.808	333.159	452.84	453.547	460.461	411.888
KIF13B	0.57931	4.44503e-166	12.06	13.593	13.328	12.159	18.805	18.763	18.623	20.221
SLC17A5	0.831488	3.75838e-218	20.762	23.526	22.459	21.656	38.972	38.797	39.346	40.203
PLSCR4	0.540592	0	165.289	171.878	181.191	177.594	251.862	236.718	271.59	252.142
SERINC1	0.497299	0	135.286	138.44	150.733	140.729	204.654	195.38	216.142	181.627
LTBP3	0.352414	1.42145e-275	105.748	102.525	111.068	105.827	133.887	133.293	127.903	147.728
DECR2	0.317524	5.64321e-12	12.649	9.301	13.506	13.425	14.425	14.388	14.264	17.839
ANO10	0.309805	1.62931e-74	43.348	43.92	46.718	42.573	55.741	50.574	55.038	57.5
FKBP14	0.346047	9.7152e-116	45.731	44.978	45.399	45.385	58.64	59.474	58.582	53.996
SPHK1	0.654796	1.35983e-175	28.442	28.413	32.212	29.797	46.92	51.291	41.889	47.041
GDE1	0.30983	3.85207e-107	53.083	58.802	61.427	55.118	73.43	67.199	72.54	69.985
JCAD	0.306817	2.50868e-100	26.198	25.495	27.378	27.514	33.976	31.598	32.916	33.354
PTGFRN	0.33441	1.36684e-259	87.074	87.224	88.528	89.115	116.272	108.137	108.701	110.64
RRBP1	0.320798	0	159.754	159.325	157.674	154.226	190.21	186.766	189.92	221.211
GNG12	0.406682	0	438.285	411.805	441.252	437.799	582.224	554.332	606.243	549.409
DKK3	0.468318	0	81.542	84.258	88.041	85.575	120.206	117.699	118.123	113.554
SEPTIN9	0.615511	0	25.918	27.297	27.872	27.208	42.099	41.865	38.003	43.954
PCYOX1	0.533102	5.58224e-275	42.091	41.711	40.717	43.208	60.682	58.402	61.826	61.799
ADAMTS1	0.449822	3.36597e-256	53.779	55.839	55.474	53.478	72.868	76.155	78.317	71.2
CEMIP2	0.521634	2.69908e-284	32.97	36.03	34.832	37.238	52.654	51.124	48.865	49.876
CYB5R1	0.709756	5.50374e-122	28.987	34.513	30.793	33.282	49.249	53.895	52.905	52.606
ATP6V1H	0.308821	1.65624e-29	20.855	18.321	23.163	22.091	24.911	24.731	26.542	28.4
RABAC1	0.620689	1.20033e-169	112.305	128.241	128.224	120.371	182.133	188.545	179.015	202.417
RAB23	0.363143	3.44777e-57	19.414	19.506	22.253	18.83	26.617	24.832	28.471	22.983
NDRG4	1.29324	0	53.033	54.341	52.886	52.907	127.204	136.576	116.746	141.905
SLC12A4	0.297897	2.60256e-66	34.401	32.211	33.041	34.125	41.125	40.835	40.255	42.246
BAIAP2	0.292632	4.44548e-06	2.792	2.6	3.065	2.772	3.6	3.482	2.822	3.851
HPSE	0.303185	3.45974e-30	17.598	15.422	17.15	16.377	21.456	21.349	20.66	18.646
ITM2B	0.353786	0	74.436	76.582	78.193	74.751	98.772	92.194	97.542	99.929
MAN2B2	0.593606	1.50194e-234	18.781	18.632	19.963	18.891	29.13	28.194	27.54	30.226
POFUT2	0.505327	1.22532e-149	28.632	27.606	29.931	28.662	37.726	42.901	37.875	44.496
LAMTOR2	0.287662	1.29183e-26	91.507	126.2	117.574	80.358	119.493	117.046	120.698	150.118
TSC22D4	0.467586	2.93093e-171	70.161	71.324	77.518	68.038	103.906	93.515	89.849	109.65
PLXND1	0.357733	0	225.381	192.851	213.627	218.439	282.66	260.636	252.105	294.181
IER3IP1	0.285115	4.03754e-66	38.384	39.539	43.001	40.403	49.754	45.009	55.191	46.625
F11R	0.341347	5.17785e-220	90.42	93.534	96.076	90.032	117.186	116.708	118.239	116.714
NPTN	0.635274	0	69.864	66.766	70.899	72.785	113.697	105.254	111.718	104.726
CPQ	0.633324	1.29176e-93	22.464	20.697	24.313	23.146	35.732	34.195	35.905	34.734
SLC12A7	0.348727	1.8645e-41	15.969	13.344	16.893	15.735	19.785	19.268	18.806	21.02
SQOR	0.427595	8.36952e-52	22.075	22.895	26.585	21.699	31.031	29.126	31.093	34.177
SUSD5	0.412829	8.72996e-138	41.317	42.727	40.537	42.472	56.557	52.669	57.625	55.547
ATP5MG	0.409064	1.10797e-140	30.918	31.733	35.396	31.119	37.901	36.347	55.566	41.697
PRSS23	0.79854	0	501.933	515.861	527.764	499.428	898.035	875.477	895.847	887.571
ACYP2	0.386642	6.12295e-05	1.121	1.699	1.455	1.07	1.743	1.647	1.64	1.959
TAGLN	3.27309	0	32.954	34.628	31.517	32.914	330.357	348.06	297.961	299.85
TRAM2	0.569863	0	70.287	70.244	71.339	71.359	109.757	101.713	106.727	102.225
ADIRF	1.22147	1.57785e-174	30.17	35.193	38.364	24.054	66.915	72.466	72.054	86.536
ACTBL2	0.500634	0.351062	0.092	0.154	0.049	0.065	0.126	0.206	0.179	0
RETSAT	0.308367	4.13908e-58	37.726	42.691	40.279	36.233	47.445	49.041	46.276	51.565
KANK3	0.567286	2.44742e-74	17.551	18.434	22.778	18.832	29.902	29.469	24.338	31.268
THSD4	0.489584	4.64481e-142	14.582	15.211	15.016	14.55	21.807	20.528	21.146	19.863
GDPGP1	0.597264	3.22383e-61	7.62	6.79	7.969	7.747	10.471	11.692	10.667	12.748
RFLNA	0.826303	0	86.045	85.045	88.814	84.316	153.46	166.161	138.612	152.119
TMEM87B	0.278822	1.42658e-75	42.476	38.158	44.657	42.568	51.617	49.862	53.91	48.259
HSPA12B	0.560594	2.04634e-57	12.822	15.175	14.798	13.502	21.175	20.23	19.152	22.476
HDHD3	0.439225	3.28702e-10	5.568	4.628	5.639	6.711	8.305	7.62	7.545	7.101
SLC38A10	0.520373	0	65.078	58.443	66.349	60.878	85.478	88.277	83.651	102.25
TMEM9B	0.659337	0	67.428	66.785	71.474	66.026	111.205	107.01	109.437	101.482
NECAP2	0.31734	1.0432e-81	82.004	87.44	99.381	85.451	113.283	105.103	106.108	116.946
ARMCX3	0.600852	0	94.316	105.294	105.879	91.118	146.225	154.282	155.456	145.538
TSPAN3	0.375702	0	91.567	95.929	99.305	90.674	121.145	122.79	126.405	119.424
TSPAN9	1.01334	0	28.416	30.717	32.651	30.246	59.726	60.023	57.538	69.045
CRIP2	0.396956	7.48131e-195	190.245	176.589	192.401	183.59	245.162	256.45	220.661	255.826
SLFN5	0.577149	2.56693e-269	16.955	18.421	18.428	18.209	27.952	26.324	27.966	25.196
DPY19L1	0.385426	1.60875e-218	51.597	50.642	53.527	50.78	66.843	67.776	68.602	66.58
USP41	2.0583	0.2806	0.093	0	0	0	0.191	0.209	0	0
TATDN1	0.297417	5.96919e-20	24.092	27.684	26.862	21.702	29.816	26.767	30.52	36.21
CPNE8	0.298534	8.67979e-30	17.388	15.471	18.274	18.53	21.478	21.194	23.128	19.879
FAM219A	0.330312	6.34449e-66	33.291	39.988	39.171	33.699	43.436	46.416	44.317	49.583
MYCT1	0.324732	2.90451e-244	169.971	172.316	185.473	174.627	224.219	216.338	230.484	208.652
DCBLD1	0.362927	3.73925e-117	57.72	54.088	54.868	56.725	70.52	73.251	73.639	69.892
TMEM104	0.409753	1.20138e-44	13.4	14.197	13.565	12.445	16.778	18.243	16.998	19.197
SDF2	0.542933	3.05918e-89	49.641	52.823	53.85	52.838	76.792	78.277	75.017	74.636
C1orf198	0.474213	7.77078e-48	12.475	12.089	10.637	12.377	15.977	17.181	15.852	17.085
TOR4A	0.464737	9.34729e-150	38.194	43.067	43.312	39.605	55.795	60.782	52.137	57.864
DNAJC16	0.364008	6.99397e-45	10.332	10.073	11.002	10.053	14.751	13.39	13.076	12.143
C6orf47	0.55437	4.95751e-45	13.602	16.995	13.435	12.934	21.859	20.205	18.732	22.862
CALHM5	0.87145	2.12621e-255	6.957	8.023	7.723	7.862	14.902	13.953	14.924	12.143
UBA6	-0.28869	1.23122e-41	30.808	26.982	30.475	30.123	24.503	22.221	25.556	24.637
WDR91	-0.404182	2.32313e-06	2.627	2.606	3.301	3.069	2.153	2.024	2.01	2.58
DDX39A	-0.378115	8.71264e-58	98.551	92.993	102.755	97.421	68.748	76.859	71.286	84.512
MPHOSPH10	-0.363924	8.05727e-32	46.355	40.191	49.909	45.706	32.433	33.611	38.808	36.695
PIR	-0.597216	2.6956e-94	91.939	87.366	105.351	83.76	59.3	49.294	62.105	72.833
UBE2C	-0.784157	1.97875e-106	72.329	72.769	71.998	79.822	41.215	45.7	37.795	47.706
SCD	-1.48504	0	210.622	218.862	226.742	216.05	81.847	73.822	80.057	75.883
CHD1	-0.44409	2.39807e-61	21.4	21.592	22.283	22.333	16.196	14.686	17.683	15.83
STX16	-0.357639	3.16487e-70	60.084	63.159	64.213	60.824	47.327	49.644	44.393	52.403
PRMT5	-0.474145	5.78482e-76	69.48	71.897	67.841	70.614	54.194	50.905	46.08	50.269
NDC80	-0.742055	1.0483e-77	22.658	19.372	24.38	26.162	15.234	12.248	14.535	13.329
HNRNPDL	-0.54797	0	207.626	210.694	217.551	212.174	140.208	142.317	152.365	145.156
HAUS5	-0.442697	1.44197e-13	6.945	9.527	9.154	7.809	6.714	6.588	5.521	5.776
SCAF4	-0.313833	4.55237e-20	28.169	27.565	28.404	28.36	23.187	20.965	23.123	23.229
LUC7L3	-0.328366	1.04029e-69	48.223	48.552	52.694	47.676	38.862	37.6	40.078	40.473
KIF4A	-0.554443	1.93012e-57	23.384	20.15	22.539	24.64	15.759	15.582	15.302	15.124
SMC2	-0.643077	3.96566e-106	22.28	18.254	21.54	23.165	13.97	12.764	14.25	13.597
IPO7	-0.325111	7.89372e-229	216.68	204.792	216.852	224.511	179.192	162.266	182.051	165.237
PARN	-0.351883	6.97205e-17	10.74	10.425	10.553	10.068	7.849	8.617	7.98	8.295
YEATS4	-0.419982	1.47574e-19	35.815	31.633	35.77	31.523	24.295	22.063	28.421	25.93
ASMTL	-0.302707	8.38002e-13	32.8	25.661	35.861	35.24	25.106	26.785	25.896	27.252
CEP43	-0.305417	2.60361e-11	4.766	4.767	5.297	5.235	3.851	4.338	4.088	3.959
TTC4	-0.289126	2.29339e-12	33.627	35.064	34.816	30.105	24.955	29.51	24.83	30.052
FADS2	-1.12684	0	170.402	177.16	187.152	174.523	82.577	78.731	74.887	88.576
DHFR	-0.635391	3.21391e-127	45.568	40.073	43.576	48.199	29.378	27.248	30.462	27.125
GSR	-0.522921	5.69669e-76	44.827	45.778	52.683	50.236	31.086	32.542	33.859	37.197
FTL	-0.265337	0	5724.08	6132.05	5977.67	5634.64	4815.63	5042.97	4763.04	4904.2
FTH1	-0.256063	0	4596.85	5387.86	5176.43	4613.4	4176.47	4307.71	4152.32	3922.11
VWF	-0.564394	0	172.448	145.862	177.257	169.989	112.677	97.411	100.523	139.463
CDK1	-0.584078	1.08289e-100	76.236	71.743	81.481	78.032	52.947	50.935	54.314	46.923
ENO1	-0.300512	0	1002.1	928.538	1026.47	989.183	783.517	752.172	770.55	898.002
LDHB	-0.474132	0	573.406	633.189	651.488	578.996	427.86	405.903	469.197	451.491
SLC3A2	-0.312519	9.51107e-60	95.815	97.636	97.413	94.621	74.108	87.535	69.207	79.555
ASNS	-2.5079	0	71.318	66.229	71.523	70.01	13.089	11.897	11.234	12.842
ENO2	-0.31463	2.57123e-13	23.103	25.412	25.801	24.918	18.947	20.447	20.491	19.904
HMGB1	-0.769759	0	210.793	204.382	204.781	212.395	127.114	118.786	125.387	116.898
GSTM1	-0.809384	3.66399e-33	18.416	20.8	20.218	16.519	11.511	10.648	9.571	11.609
HMOX1	-1.93029	0	271.253	296.129	304.536	268.697	72.654	76.785	73.284	76.545
PARP1	-0.49895	7.5477e-161	84.889	79.391	82.86	84.854	56.559	53.046	59.763	65.557
UCHL1	-0.38282	1.29425e-99	269.092	291.822	325.242	274.699	202.216	224.894	234.605	228.587
ESD	-0.405684	3.65074e-45	44.138	39.154	45.128	43.103	35.142	30.232	32.006	32.098
MAP2	-1.06689	1.26174e-155	7.435	6.534	7.879	7.328	3.543	3.472	3.989	2.921
SLC2A1	-0.53452	2.65493e-36	18.084	16.168	17.8	18.484	12.811	12.565	10.803	12.517
UMPS	-0.400219	2.98978e-27	14.111	13.758	13.237	13.778	10.242	10.107	10.975	10.263
TOP2A	-1.08736	0	78.244	72.782	74.067	76.041	36.839	34.866	37.212	32.801
G6PD	-0.742828	0	160.06	158.493	168.837	157.739	95.75	99.803	89.701	100.252
UBL4A	-0.351769	7.33724e-21	39.178	37.787	37.805	43.801	31.333	32.708	30.299	29.919
MTHFD1	-0.657847	1.64926e-140	20.813	18.832	22.864	20.01	13.02	11.662	13.17	14.449
ANXA3	-0.310413	3.11664e-25	78.478	79.01	80.331	77.2	63.205	57.838	69.845	63.146
MTHFD2	-0.94469	0	68.749	70.299	69.414	69.487	35.905	36.969	37.784	33.746
TRIM27	-0.368858	2.43094e-41	57.344	62.457	57.748	57.256	44.194	43.432	44.037	50.168
SNRPB	-0.355394	5.71553e-64	217.073	206.544	228.616	213.146	164.108	154.941	155.849	201.53
FABP4	-0.588618	6.03973e-44	78.034	61.162	66.853	82.058	48.356	41.322	48.539	53.367
GLUL	-0.403914	1.67727e-88	34.103	36.717	35.057	33.569	26.924	25.917	26.075	26.477
AKR1B1	-0.553022	4.12058e-101	89.362	89.693	103.337	91.824	60.404	60.75	61.535	72.372
B4GALT1	-0.398105	3.00251e-113	84.793	86.342	85.143	88.074	65.528	66.217	65.653	63.914
CBR1	-0.531478	7.38686e-63	48.663	53.036	51.285	48.596	34.958	38.491	32.467	33.545
GCFC2	-0.373959	5.78487e-21	16.336	14.716	17.521	17.264	12.345	12.099	13.87	12.489
FER	-0.270207	2.79835e-12	8.474	8.24	8.842	8.96	7.423	6.668	7.564	6.965
STMN1	-0.546459	0	319.475	312.134	323.108	311.47	222.213	209.772	231.56	203.41
GOT1	-0.445202	2.01203e-35	50.359	52.858	49.722	45.352	35.58	36.606	36.098	37.356
UBTF	-0.261762	1.16081e-32	49.708	50.77	48.11	50.225	40.078	40.497	41.683	43.565
IGFBP2	-1.13245	9.5429e-272	65.086	73.566	76.214	62.751	35.178	33.843	28.075	29.534
NCL	-0.520002	0	618.802	613.348	599.696	612.401	421.298	430.977	457.755	394.516
BTF3	-0.278943	4.0476e-127	537.804	586.308	561.508	526.761	450.989	471.457	460.81	440.176
MSH3	-0.304368	6.17286e-07	8.045	8.118	8.362	8.052	6.623	6.332	6.545	6.88
NPR2	-0.506067	4.47128e-44	20.323	21.699	22.338	20.862	14.817	15.66	14.528	15.002
SYT1	-0.812768	1.34506e-88	12.334	12.406	13.259	12.994	7.562	7.205	8.414	5.847
GART	-0.410949	2.54412e-77	49.487	44.58	50.51	49.681	37.426	36.555	35.593	36.532
PAICS	-0.540049	0	105.346	103.373	103.838	104.227	73.515	70.632	76.118	66.376
WARS1	-0.363847	8.56428e-229	196.865	207.799	202.389	192.767	159.889	138.062	150.901	172.679
MCM3	-0.530899	1.77339e-101	58.468	55.335	59.58	55.367	40.911	36.651	37.741	43.019
BRD2	-0.359712	1.36376e-128	90.659	95.874	93.433	92.089	73.877	70.055	72.211	73.806
DNMT1	-0.449323	8.93572e-89	30.656	25.578	27.805	30.245	20.801	19.501	20.531	22.866
HMGB2	-0.922999	0	226.708	245.033	228.562	224.891	122.803	124.361	124.019	116.773
TARS1	-0.607194	0	175.009	170.203	173.904	171.837	115.504	108.561	119.486	110.039
GSTM2	-1.0013	7.32621e-26	3.303	4.046	3.951	3.125	1.337	2.057	1.789	2.021
POLD1	-0.522357	1.33052e-47	22.287	19.201	22.317	23.057	14.725	16.114	13.496	16.14
GCA	-0.277274	2.54981e-05	7.217	6.403	8.406	8.699	7.606	6.263	5.867	5.616
ERCC5	-0.262008	2.82849e-14	29.702	30.49	31.246	29.902	25.037	24.013	25.6	26.538
TKT	-0.908216	0	273.982	246.231	284.644	260.66	137.059	134.346	132.227	164.12
SLC7A1	-0.589744	2.16257e-202	43.709	44.413	44.014	44.039	29.294	29.855	29.614	28.297
MAT2A	-0.440943	3.2741359800665e-317	247.585	254.139	253.343	244.614	180.935	193.802	183.726	177.954
RRM2	-0.657734	0	80.261	83.322	78.289	79.141	51.753	53.802	51.768	46.157
ATIC	-0.659226	4.05257e-115	58.711	52.771	59.885	57.566	32.236	35.123	37.846	39.758
TTK	-0.791632	6.46833e-104	23.421	21.343	22.681	23.489	13.557	12.987	14.035	11.951
SHMT1	-0.661063	9.58566e-35	12.913	13.961	16.365	11.952	8.571	9.38	7.719	9.232
RPA3	-0.362336	0.000693598	6.078	5.825	5.827	6.044	4.588	4.304	4.737	4.864
RFC1	-0.289099	2.19702e-22	30.074	25.782	29.651	28.148	24.047	21.547	24.553	22.869
CBS	-1.78991	4.81665e-63	4.557	4.284	4.823	4.085	1.201	1.016	1.052	1.861
FEN1	-0.408342	1.20105e-59	91.846	93.862	94.671	90.087	70.266	72.088	68.675	68.112
MLH1	-0.374364	8.86128e-17	18.152	21.281	18.496	17.13	14.355	14.541	13.707	15.3
RFC5	-0.316061	3.27436e-08	16.057	17.008	18.307	16.841	12.364	14.508	12.894	15.026
RFC3	-0.452425	1.373e-21	21.098	19.27	20.254	21.436	13.633	15.994	17.313	13.028
GARS1	-0.602684	0	174.125	161.494	171.056	168.269	109.831	107.783	115.294	111.56
TMPO	-0.689633	0	80.116	77.385	80.688	85.751	52.808	48.442	51.316	48.279
STAT5A	-1.00904	8.03687e-85	10.663	9.103	11.487	9.868	5.902	4.748	4.882	4.898
MTREX	-0.478019	1.24676e-84	37.008	36.434	39.456	37.727	27.567	22.921	29.789	27.865
SLC1A4	-0.379576	6.08156e-21	17.426	17.003	15.868	17.907	14.021	12.316	12.73	13.358
MSH2	-0.464822	1.21139e-49	9.433	8.885	9.25	9.329	7.235	6.292	6.63	6.576
ME1	-0.78018	4.68442e-171	47.213	47.176	50.709	44.79	26.762	26.525	30.06	27.222
GCLM	-0.711719	3.2241317442706e-316	70.907	67.707	75.193	72.575	41.758	42.724	47.463	42.916
NES	-0.723546	0	392.669	430.375	420.525	396.063	238.263	245.112	265.564	244.032
NR2C2	-0.270072	7.72241e-27	24.593	24.636	25.758	24.967	20.823	20.41	19.584	22.072
RPIA	-1.05694	8.54253e-120	31.747	37.971	40.704	32.584	18.393	15.149	18.379	16.813
NASP	-0.750064	1.1216e-239	63.487	58.646	61.665	60.713	35.826	35.491	37.554	36.508
DHPS	-0.314622	1.97132e-11	33.103	33.576	37.212	34.562	25.4	26.814	25.167	33.943
ALDH7A1	-0.754752	7.33453e-138	21.015	22.261	22.096	21.76	12.088	11.491	13.3	14.758
AARS1	-0.809412	0	77.875	75.62	77.791	79.326	44.907	43.149	44.285	44.897
CARS1	-0.505035	2.67972e-101	61.475	57.65	60.403	58.695	42.574	40.287	38.145	46.855
SARS1	-0.624121	0	236.532	241.64	238.938	234.45	147.319	156.85	154.686	158.53
PRIM2	-0.38015	8.77706e-12	10.678	9.276	9.869	9.993	7.294	7.333	6.995	8.97
CTCF	-0.306646	6.64814e-24	27.761	27.859	27.867	27.366	22.923	21.593	21.916	23.194
LIG3	-0.503782	3.34857e-43	10.824	10.675	10.91	10.57	7.041	7.549	7.712	8.008
KNTC1	-0.984286	1.37655e-123	8.536	8.264	9.044	8.029	4.255	4.161	4.298	4.406
STAT5B	-0.629487	7.88771e-131	34.698	35.111	34.857	36.014	21.534	22.486	21.635	25.28
BMX	-0.462336	1.88345e-114	103.483	99.566	112.203	99.365	73.832	63.453	74.699	88.948
PGD	-0.410938	2.54923e-286	365.641	366.872	412.574	356.803	273.683	269.974	280.101	305.864
MSH6	-0.342034	3.23449e-69	43.673	45.313	45.238	42.982	36.45	33.255	37.784	32.313
BLVRA	-0.458099	1.5117e-27	52.872	61.537	67.462	51.302	41.585	40.418	42.472	45.261
PLK1	-0.7602	2.41405e-229	89.494	82.617	81.55	89.355	47.605	52.325	48.804	53.786
YARS1	-0.818615	0	83.071	78.73	82.045	82.301	45.716	43.175	46.85	49.178
BCAT1	-0.330238	4.19299e-214	126.625	126.769	132.305	129.1	99.639	101.524	111.622	96.688
CSE1L	-0.442082	4.05804e-193	157.178	141.699	162.735	155.134	113.617	107.336	122.643	110.372
MARS1	-0.796136	0	117.967	116.117	116.159	122.606	64.937	68.158	68.347	70.865
POLE2	-0.510836	1.64804e-11	10.149	7.918	10.343	10.639	6.302	6.896	7.365	6.841
HSD17B7	-0.612635	1.17571e-12	9.149	10.97	10.234	12.331	6.312	5.876	8.27	7.456
GEMIN4	-0.593937	1.43725e-63	17.407	16.396	15.729	17.386	10.689	12.064	10.637	10.944
EEFSEC	-0.891313	5.05464e-56	17.868	16.586	15.801	19.597	8.119	9.843	8.408	11.287
RPS8	-0.415544	0	2300.43	2188.07	2476.81	2264.59	1738.82	1635.23	1673.24	1872.71
TUBA4A	-1.22258	5.66469e-45	5.416	5.713	6.462	6.11	2.275	2.611	2.218	3.05
IGBP1	-0.361617	3.88252e-27	63.41	64.747	66.083	63.189	51.221	49.355	50.201	49.577
PSPH	-0.784196	1.55744e-73	24.52	26.26	28.143	27.766	15.422	14.662	14.146	17.72
PRKDC	-0.293219	1.27991e-74	39.442	36.551	38.459	39.219	30.614	31.426	31.884	31.483
CRADD	-0.283074	0.0147057	4.593	6.108	5.962	5.24	4.06	4.241	4.83	4.869
COG7	-0.338819	9.32439e-09	10.904	10.409	11.852	10.818	8.644	9.238	8.226	8.668
CDC42EP1	-0.361494	6.67667e-54	92.158	83.765	87.054	90.95	72.552	71.38	64.557	66.992
FABP5	-0.454116	4.16561e-117	305.218	532.182	295.921	289.783	280.497	240.033	248.865	269.409
SLC7A5	-1.39897	0	51.732	48.108	49.227	51.936	19.662	19.431	17.732	19.393
EXOSC10	-0.271911	3.03021e-25	69.561	60.909	68.678	67.191	53.647	51.623	55.489	59.828
PFKP	-0.304274	1.99126e-129	163.843	151.123	166.915	165.655	124.55	119.616	126.493	153.747
CENPE	-0.659783	8.4446e-125	18.405	14.471	15.555	17.018	10.507	9.004	11.773	10.142
CENPC	-0.401986	2.73298e-17	7.547	7.209	7.38	7.644	6.538	4.898	5.151	5.95
MVK	-0.387879	4.76649e-08	6.855	6.212	8.186	5.967	4.779	4.965	5.168	5.89
GABPB1	-0.320605	1.6589e-27	28.699	27.142	28.975	28.24	23.686	20.681	23.516	22.644
HSPA14	-0.349349	1.92665e-11	24.135	20.35	25.196	25.734	20.291	18.456	17.994	18.153
SCRN1	-0.308024	6.76655e-96	105.901	102.051	100.428	102.591	84.648	81.645	85.728	79.939
TRAP1	-0.425914	5.32488e-56	41.497	39.482	44.944	41.434	29.177	28.951	28.881	37.565
ACACA	-0.389846	1.91436e-47	15.284	15.934	15.532	14.824	11.595	11.56	11.848	11.99
MTAP	-0.411579	2.94713e-57	14.753	14.212	15.02	14.347	11.871	10.465	11.542	9.975
SELENBP1	-1.89318	7.44034e-100	9.146	10.648	8.864	11.949	3.137	2.729	2.411	2.652
PTK7	-0.927643	2.40813e-140	15.03	15.898	15.778	15.565	8.282	7.773	8.682	7.998
XRCC4	-0.672466	3.52164e-24	17.318	15.038	19.018	16.642	10.545	9.542	13.894	8.693
PPIG	-0.307418	1.70556e-31	29.298	30.831	29.962	30.199	25.712	23.399	25.418	22.675
FKBP5	-0.657325	3.9729462510285e-312	38.038	35.119	38.732	36.541	24.77	21.938	23.986	23.417
EIF4EBP1	-0.865819	4.88894e-265	232.404	255.71	251.284	239.652	126.271	140.039	127.691	143.236
CUL2	-0.607654	2.3858e-113	21.134	18.582	22.65	21.127	13.909	12.172	14.531	14.18
NACA	-0.323216	3.00869e-168	111.442	111.315	115.024	110.256	91.241	87.436	93.123	86.309
EXOSC2	-0.448788	1.21944e-29	11.119	11.177	10.962	11.86	8.329	7.517	8.422	8.787
LRP8	-0.972978	4.79321e-197	11.539	11.752	12.026	12.069	5.988	6.03	6.514	5.607
POLA2	-0.381581	2.16319e-16	13.453	15.067	15.918	14.464	11.377	10.622	11.101	12.112
WRN	-0.405605	1.27841e-23	10.214	9.798	9.985	10.296	7.762	7.787	7.173	7.695
EIF2B1	-0.314661	2.11476e-24	40.933	39.804	42.497	45.975	34.336	34.269	33.132	34.313
HLTF	-0.305441	4.39045e-19	23.601	21.059	26.189	23.877	18.393	18.657	22.302	17.299
MDC1	-0.426872	8.01734e-36	14.54	13.931	14.607	15.022	10.892	10.834	10.557	10.935
BMS1	-0.457972	2.15243e-69	24.683	24.344	24.591	26.249	18.322	16.51	19.794	18.077
USP10	-0.384257	5.88385e-71	75.643	71.196	79.263	71.696	60.114	55.094	57.508	55.448
KIF22	-0.725786	4.40407e-129	31.386	35.989	31.271	32.126	19.204	20.205	18.96	20.703
PTGR1	-0.297296	3.22738e-22	44.951	51.215	59.941	46.366	37.983	36.309	40.985	49.49
NCAPH	-0.792891	1.33671e-64	8.611	10.267	9.383	9.572	5.417	5.439	5.301	5.678
NCAPD2	-0.534164	4.31222e-132	51.483	49.969	50.313	50.195	35.626	34.68	32.841	36.317
SETDB1	-0.429082	7.89055e-34	20.075	22.396	22.141	21.404	15.765	14.967	16.245	16.909
POLD3	-0.537121	1.48391e-43	17.256	15.621	17.387	18.214	10.902	12.374	12.172	11.742
KIF14	-0.664253	6.67608e-39	6.799	7.108	6.883	6.199	4.644	3.713	4.757	3.915
WDR43	-0.535897	4.44179e-123	62.371	58.082	60.131	66.951	45.031	39.819	44.092	41.789
DLGAP5	-0.72897	6.32174e-238	84.389	71.779	75.693	83.582	49.238	44.237	52.776	44.065
SF3A2	-0.28661	2.17479e-22	88.986	84.051	92.35	85.759	74.896	67.333	66.348	79.301
TSN	-0.345818	1.98516e-54	67.225	67.683	64.181	68.897	54.427	52.781	55.942	47.717
TRIP13	-0.511707	4.07223e-55	45.828	40.283	45.905	44.747	30.836	31.755	30.643	30.745
RBBP7	-0.300815	6.0633e-41	85.383	86.213	89.605	87.694	69.622	71.693	70.14	71.775
PCK2	-1.94206	0	37.555	39.941	43.375	38.729	11.973	10.379	8.445	10.735
TXNRD1	-0.578943	0	370.124	368.391	404.109	374.431	258.851	252.593	263.252	240.901
ERCC6L	-0.770581	9.7566e-49	10.292	10.053	10.199	11.207	5.979	6.19	6.085	6.218
QRICH1	-0.33133	5.16079e-49	65.533	63.493	67.836	66.701	52.582	49.635	53.003	54.26
CCDC88A	-0.435423	5.61502e-103	19.369	17.02	19.298	19.596	13.579	13.558	14.757	13.775
TMEM35A	-0.364902	1.41846e-21	45.282	47.267	49.177	47.483	34.344	39.373	38.766	34.441
FASTKD1	-0.537606	2.50044e-32	11.963	10.717	12.621	11.968	8.263	7.729	8.883	7.688
NOM1	-0.374263	4.06564e-24	16.068	16.943	17.118	17.508	14.573	11.652	13.141	12.815
CEP78	-0.440253	1.1548e-40	10.392	10.136	9.805	10.025	7.338	6.914	7.969	7.522
SLC27A3	-0.909887	8.95794e-67	13.138	11.877	14.859	13.494	7.071	7.279	7.028	7.024
PPP4R3B	-0.350609	3.94689e-62	55.814	52.552	55.829	56.096	43.382	42.242	46.389	40.75
DNTTIP2	-0.3063	1.31261e-35	41.341	37.994	37.741	44.928	34.022	32.297	35.122	29.573
VARS2	-0.520104	3.88236e-29	13.837	14.525	14.717	13.743	9.825	10.515	9.288	9.994
PDSS1	-0.356406	5.89475e-06	12.138	12.122	11.945	13.802	9.789	9.729	8.342	11.2
TUT4	-0.426925	1.4673e-25	10.252	8.35	9.242	9.563	7.359	5.859	7.318	7.288
RNASEH2B	-0.735086	2.59207e-34	2.711	1.989	2.611	2.657	1.512	1.429	1.384	1.662
LIN9	-0.553942	4.78012e-19	7.867	7.797	7.257	7.717	5.097	4.67	6.063	5.038
CROCC	-0.389458	4.99976e-16	8.649	8.554	8.356	7.55	5.714	6.08	6.447	7.034
OBI1	-0.502991	5.73896e-48	30.382	27.788	30.821	30.934	22.17	19.989	22.825	19.639
STEAP3	-0.423449	1.4375e-45	30.903	31.312	34.338	29.296	22.083	24.039	24.329	23.386
INTS3	-0.261424	9.56221e-20	29.231	28.431	30.348	30.53	26.352	24.419	22.492	25.63
CDCA2	-0.527208	2.80763e-38	21.038	17.554	19.416	20.04	14.321	13.753	13.177	12.905
DHX57	-0.427576	1.60861e-27	15.004	13.795	16.412	15.918	11.418	11.634	11.288	11.109
TAF2	-0.389321	1.14869e-42	14.72	14.154	14.674	14.737	10.923	10.816	11.438	11.322
SFXN4	-0.368833	1.54083e-06	11.957	12.173	13.274	11.57	9.374	9.039	9.208	10.304
WDR73	-0.340526	3.48879e-16	13.9	15.186	13.931	13.974	11.326	11.497	11.27	10.915
BRAT1	-0.385078	8.78437e-24	29.207	23.37	28.075	23.283	20.581	21.624	16.492	20.889
ATAD2	-0.603298	1.46766e-70	18.011	17.141	16.338	17.553	10.87	11.043	11.648	11.885
TMED8	-0.298513	2.74763e-16	14.667	13.971	14.122	14.777	12.279	11.21	12.654	10.639
MTHFD1L	-0.641743	8.69988e-154	45.796	40.749	47.175	44.145	28.46	25.954	27.17	32.415
ATF7IP	-0.332287	1.60723e-50	22.253	20.521	23.27	22.391	17.816	16.268	18.399	17.758
NAPRT	-0.258829	1.30134e-06	24.55	21.891	24.555	22.245	18.233	19.441	16.818	23.435
THADA	-0.371963	4.95696e-13	3.972	3.603	3.954	3.92	3.264	2.521	2.874	3.278
H2AZ2	-0.285058	2.06819e-37	42.452	44.175	42.269	44.209	35.487	35.242	36.187	35.152
NOL8	-0.297457	5.81023e-18	18.883	18.317	19.271	19.461	16.278	13.783	16.323	15.4
ENOSF1	-0.365263	1.13287e-65	51.357	51.004	52.422	52.002	40.337	38.5	41.246	40.449
HAUS6	-0.740805	8.3038e-145	19.973	17.447	18.943	19.015	11.55	10.376	12.707	10.472
WAPL	-0.26137	2.22684e-22	33.771	32.321	35.064	35.541	28.926	28.977	29.878	26.264
CENPV	-0.669412	3.83363e-28	18.638	18.098	21.156	17.18	12.304	9.802	12.435	12.66
SLFN11	-0.501223	1.71682e-169	72.383	70.678	75.299	77.061	52.908	49.497	55.933	50.378
IQGAP3	-0.767296	5.03198e-77	11.916	12.121	12.058	11.84	6.061	7.204	7.182	7.714
CHD1L	-0.451856	1.99237e-34	22.465	21.753	25.828	21.07	15.433	15.77	16.539	18.872
NCAPG2	-0.532369	1.87096e-60	18.226	18.556	20.165	19.933	12.972	13.884	12.698	13.601
RIOX2	-0.33211	7.35391e-39	32.119	31.602	32.186	31.996	25.568	26.023	25.983	24.028
ERI1	-0.473878	4.75119e-73	37.166	33.91	37.649	37.217	26.949	24.987	27.102	26.043
ANKHD1	-0.294315	2.42491e-29	22.921	21.268	22.46	21.539	18.771	16.819	17.712	18.611
NRM	-0.507479	4.33153e-20	23.206	18.593	17.601	18.755	13.4	13.646	13.815	14.116
SPART	-0.366039	1.70841e-102	84.325	83.492	85.831	86.189	68.146	62.413	69.973	63.15
CLASRP	-0.3012	4.01988e-10	19.929	18.88	18.818	18.883	14.635	14.143	14.827	18.488
ARHGAP18	-0.384972	1.33024e-105	98.457	92.407	98.697	94.511	73.002	68.052	82.783	70.282
CISD2	-0.310924	1.43724e-16	16.14	15.207	17.535	17.136	13.926	12.729	14.475	12.088
PRPF38A	-0.762327	2.32375e-107	20.197	20.432	20.315	20.313	11.202	11.231	14.004	11.466
NHLRC2	-0.287153	4.00308e-23	15.276	14.016	15.292	15.839	12.785	12.426	12.435	11.871
SPC24	-0.561059	1.72049e-40	24.527	27.81	23.917	24.212	16.259	17.386	16.238	18.212
NUP37	-0.747802	1.02551e-58	19.149	18.729	20.91	20.629	12.247	10.995	12.221	11.829
TSPAN14	-0.444072	2.85184e-244	41.171	42.439	42.564	43.598	31.606	30.885	29.624	32.676
ATL2	-0.356504	1.85603e-28	25.653	22.997	23.675	25.764	18.591	18.441	20.306	19.274
DDX55	-0.361555	3.73861e-17	21.952	25.369	25.361	23.5	19.189	15.649	19.672	20.35
NEDD1	-0.517127	1.05269e-64	28.831	27.608	32.657	30.055	22.091	19.658	20.509	20.999
WDR36	-0.272311	7.53179e-24	30.717	28.501	31.214	31.942	26.096	24.247	25.362	25.619
PPP1R35	-0.261635	1.62152e-05	41.18	44.679	44.869	39.95	34.081	37.894	32.13	38.264
UBA3	-0.285768	6.8549e-36	126.876	127.453	135.844	124.996	103.515	98.519	116.685	103.876
ZFAND1	-0.420482	3.23423e-29	33.103	35.131	35.391	33.901	26.216	25.278	28.22	23.041
CIP2A	-0.41572	1.8115e-22	17.449	13.529	15.941	15.129	11.331	10.609	12.671	11.902
PNPT1	-0.654163	6.8689e-94	25.568	22.56	26.416	26.276	18.104	14.704	15.286	15.97
DDX54	-0.328627	9.28234e-34	37.651	34.191	40.127	39.196	28.169	29.793	27.379	35.03
NSUN6	-0.663796	1.43693e-10	3.816	5.657	4.709	5.061	3.461	2.806	2.425	3.453
UTP15	-0.477182	1.36572e-34	15.03	13.583	14.152	14.599	10.338	9.857	10.737	10.276
GEMIN5	-0.283064	3.44752e-13	19.352	18.034	18.428	17.174	14.939	13.328	17.223	14.494
NOC3L	-0.371109	7.20112e-23	26.154	21.918	25.449	24.803	19.405	18.956	18.564	19.097
ZC3H15	-0.340132	4.63906e-60	130.48	125.083	130.405	133.442	103.791	100.527	107.098	98.901
CHTF18	-0.513775	4.67001e-38	19.204	18.695	19.67	17.277	12.406	13.917	11.775	14.322
STAG1	-0.307425	2.03055e-21	19.957	19.867	20.545	20.813	16.032	15.464	17.691	16.414
GEMIN6	-0.454824	1.48745e-15	9.207	9.418	9.243	8.818	8.045	6.779	6.546	5.395
DNAJC9	-0.298138	8.43677e-39	115.469	104.893	107.405	108.445	89.015	93.059	88.97	83.727
ATG4A	-0.410757	1.66065e-36	45.336	45.776	51.877	47.707	37.674	33.502	37.674	34.596
AHCTF1	-0.309775	4.08039e-30	21.126	22.256	23.825	22.277	17.621	18.593	19.234	16.744
ANP32B	-0.480635	6.4524e-144	226.166	284.76	271.102	262.368	186.749	194.133	184.818	182.778
GTF2H4	-0.386913	5.11679e-18	37.372	36.818	40.622	30.672	26.859	29.28	27.512	27.609
HPS3	-0.404718	7.47884e-28	19.57	17.874	20.7	20.559	14.917	14.207	14.869	15.457
PSMG2	-0.343803	2.66092e-15	48.345	42.471	53.695	43.913	33.577	32.184	41.218	41.491
RFT1	-0.619828	1.37884e-27	7.29	7.046	8.151	7.831	4.612	4.972	5.036	5.108
PPWD1	-0.576158	1.24346e-65	46.074	44.594	50.065	44.829	30.727	27.193	33.667	32.877
DNAJC19	-0.510466	1.08662e-22	15.802	20.374	18.62	15.86	12.312	11.991	12.303	12.993
ASB9	-1.39012	1.35361e-44	6.895	6.807	7.723	6.448	2.695	2.145	2.74	3.052
MTERF3	-0.76502	3.35367e-69	35.715	36.193	40.976	36.142	22.413	21.755	24.135	19.389
TMA16	-0.320604	5.18776e-13	35.988	35.873	39.976	37.889	32.112	26.575	30.793	30.41
PGM2	-0.397852	1.31268e-62	60.144	57.044	66.701	60.198	48.113	45.704	46.843	44.598
AURKB	-0.693482	1.3278e-73	58.207	58.978	55.521	57.428	34.982	36.844	35.961	34.517
TOE1	-0.660932	1.95638e-39	26.644	26.449	24.352	27.345	15.253	17.71	17.26	16.052
RUSF1	-0.404846	1.61031e-30	33.862	35.903	35.077	33.435	26.633	26.108	23.983	27.718
DHTKD1	-0.294261	1.97771e-08	9.762	10.047	11.31	9.742	8.028	8.306	8.162	8.825
THOC3	-0.531492	1.49783e-56	35.289	34.756	32.926	37.841	23.62	21.373	27.112	25.313
PBK	-0.618136	7.69136e-58	38.04	41.864	40.934	38.452	25.656	26.735	26.418	24.969
PRMT6	-0.44908	1.10322e-31	18.732	18.532	21.066	19.538	15.078	15.258	12.845	13.857
SFXN2	-0.635084	6.75367e-17	2.589	2.732	3.118	2.686	1.627	1.854	1.623	2.058
SCLT1	-0.603115	4.97837e-57	13.01	13.391	13.378	14.442	9.25	8.726	9.391	8.327
USP28	-0.48158	3.21987e-43	17.909	17.978	19.241	18.95	14.081	12.341	13.591	13.04
SMC6	-0.308932	5.24209e-39	39.246	34.151	39.289	38.658	32.849	25.686	33.039	30.596
IWS1	-0.310714	1.72273e-31	53.266	51.48	54.452	52.697	42.232	40.904	45.331	42.371
SIN3A	-0.329044	3.70064e-19	9.47	8.812	9.487	10.641	7.612	7.49	8.295	7.179
UHRF1	-0.539089	7.42747e-76	28.2	26.175	26.314	29.697	17.602	18.926	19.04	20.399
DNAJC2	-0.391978	1.27515e-31	24.111	23.952	27.07	24.621	19.935	15.851	20.882	19.352
MPHOSPH6	-0.305665	1.01158e-16	67.495	67.865	63.881	61.724	52.083	53.643	55.136	50.276
DNAJC7	-0.298196	2.65307e-32	40.446	39.514	41.333	39.249	32.641	31.084	34.724	32.114
KIF2C	-0.550989	1.33631e-48	25.5	26.779	25.653	26.897	17.278	19.769	16.492	18.011
FEZ1	-0.281842	4.19962e-18	22.407	21.717	22.555	21.568	16.569	17.032	18.815	20.17
MTR	-0.276357	6.47006e-26	20.239	22.751	21.986	21.358	18.158	17.702	18.066	17.357
PRMT1	-0.385005	3.73098e-76	112.133	109.597	117.369	107.184	82.213	84.485	77.467	97.587
NCAPG	-0.489492	1.11404e-88	46.508	40.843	44.827	47.438	31.677	31.697	35.074	29.487
DDX50	-0.529297	3.06352e-50	38.787	39.53	36.555	38.396	25.708	23.265	30.115	27.109
MYBBP1A	-0.294298	1.21532e-32	46.079	39.992	44.091	46.032	35.585	37.807	32.311	37.977
GINS4	-0.420627	2.46046e-17	9.63	9.739	9.946	9.127	7.332	7.316	7.077	6.994
DIDO1	-0.269939	6.39325e-22	13.676	12.989	14.241	14.55	11.852	10.946	11.241	11.953
MCMBP	-0.379445	2.62221e-58	54.29	51.13	55.699	55.281	41.383	41.588	41.834	41.548
AARSD1	-0.25621	8.10437e-06	32.226	31.166	33.947	31.305	24.013	26.149	28.565	28.984
ANP32E	-0.853523	0	89.665	86.947	96.57	88.763	53.893	43.42	54.833	48.164
FSD1	-0.612245	1.00161e-24	17.99	14.553	21.028	16.114	11.49	11.945	10.046	12.104
WRAP53	-0.34005	4.18279e-15	15.979	15.326	18.074	16.769	12.085	13.728	12.148	14.296
MRI1	-0.368059	9.30355e-22	26.925	26.998	28.761	29.691	20.092	21.575	21.664	23.739
THUMPD3	-0.352201	4.60104e-18	18.101	20.284	20.151	20.089	15.191	14.974	16.304	15.124
KATNB1	-0.390374	1.04973e-17	21.526	18.989	19.936	20.876	14.558	16.612	14.121	16.755
SPATA5L1	-0.28555	2.35122e-05	11.344	9.189	11.718	12.173	9.512	7.721	9.172	10.041
RIOK2	-0.303456	2.92401e-16	21.396	21.171	22.098	20.986	17.544	15.955	19.427	16.477
TRMT61B	-0.494601	4.58809e-21	25.546	25.083	27.226	23.236	19.511	16.456	19.565	16.217
KIFC1	-0.664574	8.11417e-84	38.666	37.208	35.536	34.141	20.837	24.421	21.115	25.45
OSBPL11	-0.290971	5.69021e-12	17.659	15.908	19.242	16.298	13.894	13.951	15.338	13.301
FANCD2	-0.823128	7.83995e-46	4.681	4.607	4.543	4.926	2.535	2.846	2.745	2.474
EIF2A	-0.573696	1.52699e-204	82.964	81.909	89.479	81.922	57.179	56.315	57.471	54.974
NLN	-0.683809	6.6146e-211	27.57	28.433	29.375	28.653	17.151	16.211	19.492	18.131
CRNKL1	-0.342524	1.00835e-16	18.642	13.916	18.244	19.408	13.265	14.167	15.722	12.217
FTO	-0.469025	6.13807e-69	9.915	10.505	9.959	9.866	7.505	6.821	7.3	7.448
NIF3L1	-0.543644	3.19827e-14	13.193	13.493	12.595	12.533	8.366	8.866	10.182	8.131
UBA5	-0.388804	2.59642e-39	26.663	26.45	25.357	25.248	20.599	18.489	20.579	19.548
ILKAP	-0.29753	3.6586e-06	21.437	21.587	24.048	23.659	18.32	17.611	19.867	18.024
BRD8	-0.293243	8.78904e-17	21.354	20.93	22.25	24.934	18.064	17.778	18.68	18.489
MTIF3	-0.460384	4.62555e-32	71.636	80.697	82.135	71.885	59.418	50.481	57.346	55.409
TRIT1	-0.472148	2.63534e-22	8.698	8.502	9.842	8.535	6.567	6.035	6.919	6.125
SMARCAD1	-0.457015	3.09339e-65	28.751	25.788	31.003	29.213	21.391	19.261	21.434	21.511
TFB2M	-0.284438	7.50277e-06	23.093	24.479	25.988	25.755	18.987	19.378	23.172	20.006
DHX33	-0.472056	6.52662e-54	23.351	25.652	25.228	25.925	18.423	18.738	16.815	18.229
RPF2	-0.341696	5.84227e-13	15.811	14.975	15.249	15.155	11.814	12.047	12.52	11.904
ZWILCH	-0.345866	6.82e-23	27.632	27.161	28.948	28.286	21.054	19.461	25.97	21.661
ACTR5	-0.4751	2.96792e-10	9.281	7.348	8.563	9.521	6.064	6.183	6.59	6.135
ELP3	-0.293418	2.56134e-10	17.64	19.252	18.707	19.166	15.175	15.347	15.504	14.979
PPCS	-0.452329	1.90471e-37	37.064	41.418	38.368	34.065	28.668	28.502	28.754	24.373
UPF2	-0.302636	4.04349e-20	22.88	24.253	24.607	23.748	19.368	19.072	20.214	18.764
SPC25	-0.654471	2.81712e-20	16.392	17.178	17.646	16.407	9.565	9.25	13.019	11.126
MRM3	-0.432484	2.97242e-16	24.955	25.408	24.301	24.886	19.262	21.507	16.121	16.874
ABCB6	-0.516062	1.23431e-38	25.05	23.471	25.063	27.502	17.014	17.672	16.219	19.781
DCP1A	-0.375299	1.83412e-26	17.943	18.285	18.239	16.617	13.81	12.944	14.244	13.803
ESM1	-0.282352	1.46613e-182	617.041	658.689	641.748	636.955	519.937	578.787	546.24	455.417
EXOSC3	-0.443928	7.51955e-23	10.975	11.493	10.657	11.459	8.089	8.55	7.917	8.218
ANLN	-0.365643	6.16938e-87	75.827	74.097	77.202	81.745	62.509	58.021	63.73	55.461
UTP3	-0.30584	1.13729e-27	90.272	102.24	96.969	87.735	74.894	79.677	77.331	73.254
NANS	-0.324067	4.79281e-22	46.775	46.353	50.216	51.035	37.391	36.664	36.929	44.288
DIAPH3	-0.349544	1.13265e-25	23.257	22.512	24.346	24.105	17.926	17.322	19.216	19.482
SMC4	-0.810639	0	87.341	80.652	86.487	89.031	49.166	47.992	51.492	47.194
MAN2C1	-0.399229	2.08325e-58	54.813	53.116	56.257	55.156	40.338	39.385	38.377	48.218
DCAF13	-0.300137	4.10381e-21	35.077	33.786	34.902	34.051	27.948	26.515	29.799	27.668
INTS7	-0.277689	6.89827e-08	11.733	10.913	11.48	12.098	10.744	8.921	9.009	9.456
FANCI	-0.443935	1.67112e-44	22.641	20.824	23.403	23.356	17.179	16.576	16.862	15.708
POLR3E	-0.59575	1.9196e-51	19.325	19.238	20.723	18.437	12.316	12.214	13.735	13.163
RBM28	-0.423899	7.87237e-41	8.335	8.876	8.471	8.282	5.937	6.435	6.653	6.291
HPF1	-0.391969	4.12295e-17	47.685	45.113	52.228	49.631	36.66	33.958	36.159	41.568
LYAR	-0.5304	3.84778e-50	48.536	46.988	51.085	51.019	33.564	33.637	34.674	34.954
CWC25	-0.352176	3.17669e-14	19.459	22.431	20.803	17.336	15.128	15.645	16.549	15.372
BABAM2	-0.330887	2.22408e-11	20.113	16.587	20.562	20.552	14.837	14.884	14.022	18.122
NSMCE4A	-0.511404	4.61089e-36	41.842	39.148	47.403	43.123	28.915	27.784	31.065	32.56
GAR1	-0.432406	3.99114e-32	90.119	95.726	102.812	84.591	70.768	64.871	72.855	68.091
MAP3K20	-0.329934	5.00329e-31	16.883	16.863	16.866	16.919	13.117	13.45	14.5	12.658
FASTKD2	-0.324929	5.91603e-23	18.183	15.851	16.399	18.505	13.636	14.069	13.917	13.413
TECR	-0.453023	3.71044e-32	63.412	57.733	60.754	62.589	45.312	41.764	45.643	45.881
CISD1	-0.60986	2.08761e-60	35.739	37.048	42.855	39.767	27.12	23.613	26.161	24.938
MAT2B	-0.34284	9.24265e-58	77.554	80.31	89.376	81.583	66.355	60.918	68.355	63.644
NOP53	-0.308748	3.15384e-43	175.742	167.784	187.97	175.905	135.013	131.659	142.175	162.267
LARS1	-0.62933	1.12105e-301	52.419	46.773	54.194	51.977	32.516	31.587	33.635	35.023
IMPACT	-0.255003	6.18277e-13	33.033	34.352	37.985	32.984	28.91	28.733	30.303	27.992
ORC3	-0.284136	8.48136e-08	19.338	18.932	20.254	18.209	15.734	13.8	18.538	14.943
HDAC6	-0.572804	1.57748e-49	12.183	14.045	13.485	12.155	8.438	8.202	8.332	9.898
METTL1	-0.360657	1.69756e-07	18.389	21.975	19.545	21.709	16.9	15.995	14.1	16.569
CTNNAL1	-0.32732	1.53608e-49	101.958	91.696	103.675	100.639	79.526	74.465	85.029	78.166
CLIP2	-0.387432	3.59197e-34	21.956	18.092	21.064	21.152	15.935	14.797	15.15	17.007
FTSJ1	-0.32355	2.50411e-25	62.766	62.375	66.306	60.915	50.647	51.053	49.206	50.756
CGGBP1	-0.414592	1.97042e-121	67.084	68.885	69.474	68.699	50.933	51.129	54.469	49.138
CHORDC1	-0.427369	2.00555e-71	29.126	29.023	29.843	28.443	22.089	19.377	22.782	22.334
BAZ1B	-0.396738	2.5485e-76	43.668	48.161	46.582	48.054	35.356	31.855	38.157	36.265
CNOT7	-0.258183	1.46846e-37	46.327	46.388	49.42	49.128	40.958	38.435	43.395	37.134
ANAPC7	-0.255003	4.108e-18	47.374	48.425	54.09	49.521	43.273	39.903	41.296	42.63
ANAPC4	-0.403708	6.28579e-22	27.17	28.806	31.573	26.431	21.623	19.837	22.78	21.918
GGA1	-0.254232	3.24259e-10	19.919	20.619	21.029	19.504	16.104	16.445	15.705	19.718
DBR1	-0.329977	1.4243e-12	23.97	22.871	23.136	24.11	18.065	20.057	18.682	18.046
NUDT5	-0.260434	6.85652e-14	26.605	23.321	26.335	26.512	21.356	19.357	22.114	22.971
PACSIN3	-0.533306	5.35659e-22	14.052	18.35	16.48	15.619	10.957	11.363	10.412	11.835
ISY1	-0.482709	2.33789e-36	21.744	24.425	27.109	23.336	17.528	16.455	18.272	16.884
TPX2	-0.650906	2.20144e-288	106.534	94.526	103.001	105.453	66.551	62.6	66.369	65.29
NOB1	-0.364617	4.46149e-32	82.206	80.36	82.254	80.115	66.991	55.402	65.554	64.421
DDX19B	-0.538894	4.13482e-26	11.466	10.544	11.74	12.582	7.404	7.212	7.911	9.362
DUSP12	-0.348701	2.95842e-11	29.556	30.201	31.896	35.068	22.793	27.081	23.628	26.01
FAF1	-0.423707	1.03584e-21	8.609	7.635	8.771	7.583	6.324	5.412	5.77	6.795
TIMELESS	-0.501504	1.71742e-48	20.906	19.686	21.913	20.078	14.223	13.479	15.932	14.699
USP24	-0.262029	1.85738e-12	9.46	7.94	8.652	9.51	7.301	7.47	7.381	7.503
SLC7A11	-1.45064	0	85.712	81.033	91.318	90.267	29.624	35.943	33.106	28.764
AKT3	-0.401157	1.03834e-92	24.447	23.933	24.239	24.333	18.953	17.629	19.028	17.806
RUVBL1	-0.486349	2.80254e-131	91.295	79.907	85.324	84.452	57.998	51.266	58.58	75.555
ASF1A	-0.463679	8.10029e-52	54.648	49.849	57.539	57.231	39.586	40.006	41.121	38.284
THRAP3	-0.300942	2.70031e-80	120.245	125.897	129.745	127.195	102.976	97.241	102.665	105.48
YARS2	-0.312744	4.97504e-13	36.048	34.652	33.758	35.57	28.353	27.58	28.462	28.342
DERA	-0.276462	7.77239e-12	36.849	39.417	38.654	35.099	31.071	29.622	32.588	30.576
UTP11	-0.257686	7.31649e-12	53.727	50.512	55.058	52.545	47.629	41.583	45.636	42.342
PPIL1	-0.342876	1.33465e-26	86.328	87.13	92.291	92.127	78.376	70.186	70.236	63.375
GOLT1B	-0.319899	2.79444e-43	78.109	74.651	81.35	81.779	59.945	62.35	72.567	58.204
RBM19	-0.323108	2.56975e-13	12.212	11.018	11.455	12.103	9.364	8.602	8.83	10.603
HSPB11	-0.266838	0.000177202	14.342	10.536	13.883	16.073	11.542	9.943	12.211	11.878
SUPT16H	-0.515937	3.00672e-219	86.87	85.667	81.07	83.958	61.204	57.93	60.93	56.007
USP16	-0.382744	7.04022e-39	49.727	45.769	49.005	47.262	38.351	34.769	39.093	34.864
PSAT1	-1.86414	0	215.639	205.085	219.869	219.358	60.624	54.327	62.407	58.857
SLC25A15	-1.50049	1.19657e-251	17.686	17.003	20.678	19.517	7.119	6.333	6.852	6.16
TACC3	-0.434777	2.47292e-90	55.309	51.712	49.235	55.007	38.469	39.202	37.435	41.187
AP4B1	-0.335109	2.34887e-14	20.853	21.618	23.236	22.196	16.326	17.425	18.594	17.337
ROBO1	-0.512102	1.92459e-31	8.084	8.289	8.695	7.756	5.728	5.137	6.922	5.228
MAP3K4	-0.9145	1.7182e-90	10.703	9.097	10.626	11.155	5.414	4.993	5.666	5.985
IVNS1ABP	-0.47969	1.73172e-125	64.996	65.429	69.879	66.049	47.273	48.759	50.213	44.764
PLPBP	-0.29893	1.3638e-22	57.003	59.664	63.25	58.584	49.664	47.781	49.005	47.416
TNFAIP2	-0.623877	3.39996e-66	18.155	16.471	20.473	17.004	11.865	12.202	10.739	11.982
CSTF1	-0.344889	1.51768e-21	22.439	19.481	23.578	23.022	17.591	18.011	16.625	17.47
HYI	-0.353969	2.71038e-78	234.009	235.458	264.921	226.58	175.506	185.141	177.725	213.516
RBM26	-0.326943	4.11727e-41	27.096	25.455	30.803	28.376	20.995	20.678	24.184	23.216
FRA10AC1	-0.509586	1.30116e-23	15.207	12.732	17.207	15.658	8.976	11.12	11.443	11.17
TRMT11	-0.34015	2.79016e-06	4.861	4.239	4.946	4.275	3.804	3.633	3.234	3.801
PPIL4	-0.346728	2.60544e-21	37.296	31.424	35.088	35.847	24.968	26.193	32.347	26.311
LTV1	-0.462016	1.24157e-46	69.333	64.55	64.476	65.631	49.63	45.191	53.203	43.624
UBL7	-0.32904	1.49657e-09	22.991	20.885	23.213	23.505	16.48	18.646	16.215	20.777
INTS14	-0.464032	5.03688e-48	42.557	43.654	44.516	40.166	28.844	31.432	31.034	32.579
MRPL32	-0.436194	5.238e-46	46.813	48.629	48.5	45.029	32.093	35.509	37.825	34.237
DPH5	-0.48021	8.44997e-24	28.378	26.243	28.715	27.734	19.647	18.415	21.318	20.242
TMEM245	-0.544222	1.17081e-130	30.205	28.686	31.708	31.037	21.908	20.99	21.571	18.943
ESF1	-0.388802	7.30501e-24	28.655	27.214	29.849	28.621	20.959	20.69	25.37	20.308
C17orf75	-0.433694	2.63348e-15	8.611	7.961	8.931	8.66	6.321	6.804	6.669	5.498
GLOD4	-0.351097	2.08247e-28	57.576	64.815	62.957	58.361	44.176	49.246	49.411	48.231
THUMPD1	-0.555791	1.60526e-115	34.086	33.651	33.244	35.386	23.245	22.315	24.574	22.633
GPATCH8	-0.311896	2.12659e-24	20.576	18.147	19.956	19.381	15.78	16.092	15.672	15.339
UTP18	-0.403044	1.96122e-28	48.39	41.234	47.559	48.762	35.048	34.114	35.45	36.01
CDC123	-0.38046	2.28273e-34	89.76	86.471	98.346	87.741	68.103	65.712	67.773	76.741
CCZ1B	-0.318198	7.93294e-13	29.527	24.597	30.06	32.455	23.031	21.793	23.328	25.4
PWP2	-0.650436	4.60324e-11	4.237	3.414	3.841	4.822	2.73	2.032	2.689	2.941
KNOP1	-0.398421	1.59208e-23	11.772	13.078	12.197	12.47	9.523	9.115	10.621	8.308
NT5DC1	-0.479446	1.46455e-31	10.622	9.885	10.901	8.836	7.059	6.867	7.663	7.275
ANGEL2	-0.463725	5.37434e-38	21.695	20.945	19.725	21.636	15.143	14.648	16.199	14.919
HEATR6	-0.277938	2.28064e-07	7.681	7.157	7.865	8.469	7.049	6.478	6.03	6.152
RPL7L1	-0.439685	4.2408e-149	93.594	105.822	104.471	100.845	76.527	71.624	77.404	72.851
HEATR3	-0.28141	5.35079e-10	16.38	16.869	17.45	16.617	13.323	13.578	15.57	12.915
SRBD1	-0.487013	4.50135e-23	14.621	15.195	15.112	14.22	10.147	10.475	11.478	10.101
SHCBP1	-0.365414	6.98109e-36	30.706	28.091	29.225	28.915	23.222	23.484	23.979	20.086
FBXO30	-0.420043	5.12441e-45	16.636	15.949	16.14	17.103	11.77	12.074	13.674	11.681
PHF3	-0.456263	2.46943e-69	9.374	8.871	9.078	9.567	7.254	6.779	6.79	6.064
FAM136A	-0.400449	5.60881e-48	74.645	83.389	82.526	74.123	58.527	58.023	63.576	58.284
SAAL1	-0.641871	1.18524e-48	40.207	35.923	42.007	34.697	26.542	24.93	22.891	23.584
FBXL18	-0.582442	2.92349e-72	12.69	7.963	7.173	20.489	8.17	7.975	7.95	8.17
NOL4L	-0.354024	6.02343e-97	50.02	48.598	48.503	49.634	37.596	40.175	39.661	36.508
CMSS1	-0.589131	1.77437e-30	10.051	8.813	11.297	10.037	6.178	6.638	7.483	6.421
NOL10	-0.318678	2.84498e-17	26.415	23.89	26.469	26.312	20.792	18.9	20.901	22.061
GNB1L	-0.387058	2.07371e-06	2.623	2.001	2.434	2.453	1.457	1.512	1.542	2.761
NT5DC2	-0.30398	2.90131e-74	179.868	195.646	185.873	178.392	146.842	162.367	135.331	154.691
PLGRKT	-0.35569	0.000260213	16.065	14.693	16.5	19.144	14.491	10.572	14.046	12.783
DNAJC17	-0.277116	3.01758e-05	7.117	8.313	8.548	6.883	6.625	6.349	5.512	6.981
WDR70	-0.365129	3.88539e-12	14.848	13.816	17.228	14.247	10.549	11.058	12.206	12.878
MTMR10	-0.328469	5.42182e-42	35.598	33.124	34.805	37.06	26.813	27.679	29.895	27.573
WDR3	-0.339069	1.24553e-24	13.058	13.544	14.442	13.71	10.564	10.613	12.361	9.747
RCL1	-0.354698	2.39306e-08	12.389	13.575	13.717	13.658	11.269	9.78	9.984	10.679
C9orf64	-1.83517	7.9112e-106	9.143	7.733	9.414	7.614	2.485	2.022	2.82	2.172
RPL22L1	-0.902445	1.34766e-232	77.047	73.528	85.672	80.008	44.155	42.42	42.448	40.165
FAM43A	-0.277052	1.27408e-115	298.078	302.613	301.078	302.015	251.16	248.005	234.772	259.516
ISOC1	-0.51719	3.40613e-47	50.411	52.065	49.231	51.357	37.234	38.373	35.284	30.995
